# Rapid adaptation and range expansion in response to agriculture over the last two centuries

Short title: Weed adaptation to modern agriculture

Julia Kreiner<sup>\*1,2</sup>, Sergio M. Latorre<sup>3,4</sup>, Hernán A. Burbano<sup>3,4</sup>, John R. Stinchcombe<sup>5</sup>, Sarah P. Otto<sup>2,6</sup>, Detlef Weigel<sup>4</sup>, & Stephen I. Wright<sup>5</sup>

## Affiliations:

<sup>1</sup>*Department of Botany, University of British Columbia, Vancouver, Canada;*

<sup>2</sup>*Biodiversity Research Centre, University of British Columbia, Vancouver, Canada;*

<sup>3</sup>*Centre for Life's Origins and Evolution, Department of Genetics, Evolution and Environment, University College London, London, UK;*

<sup>4</sup>*Department of Molecular Biology, Max Planck Institute for Biology Tübingen, Tübingen, Germany;*

<sup>5</sup>*Department of Ecology and Evolutionary Biology, University of Toronto, Toronto, ON, Canada;*

<sup>6</sup>*Department of Zoology, University of British Columbia, Vancouver, Canada;*

\*Corresponding author email: [julia.kreiner@ubc.ca](mailto:julia.kreiner@ubc.ca)

## Abstract

North America has seen a massive increase in cropland use since 1800, accompanied more recently by the intensification of agricultural practices. Through genome analysis of present-day and historical samples spanning environments over the last two centuries, we studied the impact of these changes in farming on the extent and tempo of evolution in the native common waterhemp (*Amaranthus tuberculatus*), a now pervasive agricultural weed. Modern agriculture has imposed strengths of selection rarely observed in the wild (0.027-0.10), with striking shifts in allele frequency trajectories since agricultural intensification in the 1960s. An evolutionary response to this extreme selection was facilitated by a concurrent human-mediated range shift. By reshaping genome-wide diversity and variation for fitness, agriculture has driven the success of this 21<sup>st</sup>-century weed.

## One Sentence Summary

Modern agriculture has dramatically shaped the evolution of a native plant into an agricultural weed through imposing strengths of selection rarely observed in the wild.

## Main text

Agricultural practices across North America have rapidly intensified over the last two centuries, through cropland expansion (1), habitat homogenization (2), and increased chemical inputs (3). Since the beginning of the 1800s, cropland usage has expanded from 8 million to 200 million hectares in Canada and the United States alone (1). Since the 1960's, increased reliance on pesticides, irrigation, large-scale mechanization, and newly developed crop varieties have greatly improved the efficiency of food production in all farming sectors, a transformation oft-referenced as the agricultural “Green Revolution” (4, 5). For pesticides, however, their effectiveness has been limited by the evolution of resistance across numerous pest species (6). While technological innovation for efficient food production has risen with increasing global food demands, the concomitant conversion of our landscape has become one of the foremost drivers of global biodiversity loss (7).

Species that have managed to survive, and even thrive, in the face of such extreme environmental change provide remarkable examples of rapid adaptation on contemporary timescales and illustrate the evolutionary consequences of anthropogenic impacts. One such species is common waterhemp (*Amaranthus tuberculatus*), which is native to North America and persists in large part in natural, riparian habitats (8), providing a unique opportunity to investigate the timescale and extent of contemporary agricultural adaptation in this prevalent weed. The genetic changes underlying weediness is particularly important to understand in *A. tuberculatus*, as it has become one of the most problematic weeds in North America due to widespread adaptation to herbicides, persistence in fields across seasons, and strong competitive ability with both soy and corn (9, 10).

To understand how changing agricultural practices have shaped the success of a ubiquitous weed, we analyzed genomic data from contemporary paired natural and agricultural populations alongside historical samples collected from 1828 until 2018 (**Fig 1**). With this design, we identify agriculturally adaptive alleles—those that are consistently higher in frequency in agricultural than in geographically close natural sites which constitute contrasts in selective pressures; track their frequency across nearly two centuries, and link the tempo of weed adaptation to demographic changes and key cultural shifts in modern agriculture.

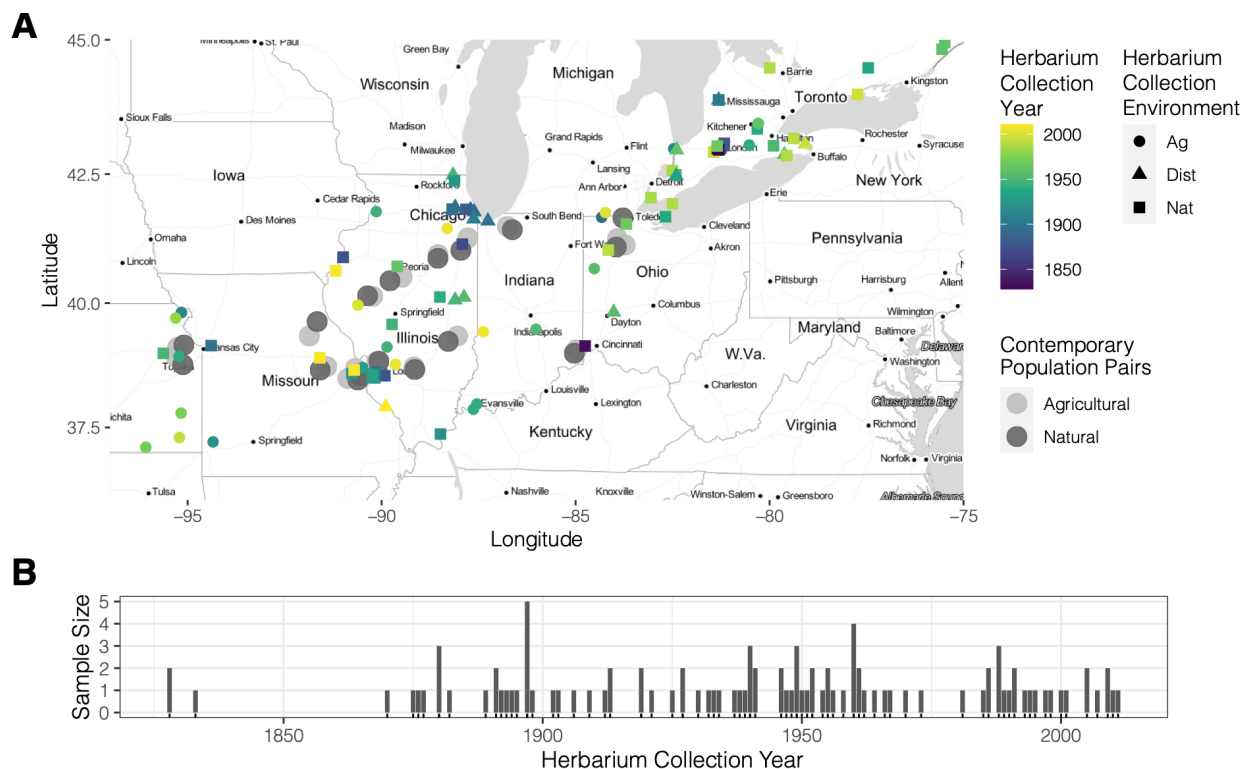

**Fig 1.** Sequenced waterhemp collections through space and time. **A)** Map of 14 contemporary paired natural-agricultural populations ( $n=187$ , collected and sequenced in Kreiner et al., 2021), along with 108 novel sequenced herbarium specimens dating back to 1828 collected across three environment types (Ag=Agricultural, Nat=Natural, Dist=Disturbed). **B)** Distribution of sequenced herbarium samples through time.

### *The genome-wide signatures of agricultural adaptation*

To find alleles favored under current farming practices, we looked for those alleles that were consistently overrepresented in extant agricultural populations compared to neighboring natural populations (11), using Cochran–Mantel–Haenszel (CMH) tests (Fig 2A). Alleles involved in agricultural adaptation (the 0.1% of SNPs with lowest CMH p-values;  $n=2,055$ ) are significantly enriched for 21 GO-biological process terms related to growth and development, cellular metabolic processes, and responses to biotic, external, and endogenous stimuli, including response to chemicals (Table S1). The importance of chemical inputs in shaping weed agricultural adaptation is clear in that the most significant agriculturally associated SNP (raw p-value =  $8.551 \times 10^{-11}$ , [FDR corrected] q-value = 0.00062) falls just 80 kb outside the gene protoporphyrinogen oxidase (*PPO*)—the target of *PPO*-inhibiting herbicides (Fig 2B). Other genes with the strongest agricultural associations include *ACO1*, which has been shown to confer oxidative stress tolerance (12); *HB13*, involved in pollen viability (13) as well as drought and salt tolerance (13); *PME3*, involved in growth via germination timing (14); *CAM1*, a regulator of senescence in response to stress (15, 16); and both *CRY2* and *CPD*, two key regulators of photomorphogenesis and flowering via brassinosteroid signaling (17–20)

(**Table S2**). These signals of agricultural adaptation are notable given that genome-wide differentiation among environments as measured by  $F_{ST}$  is negligible, a mere 0.0008 (with even lower mean  $F_{ST}$  between paired sites = -0.0029; **Fig 2C**), suggesting that despite near panmixia among environments, strong antagonistic selection acts to maintain spatial differentiation for particular alleles.

To further investigate the extent to which herbicides shape adaptation to agriculture, we assayed signals of selection for two complex resistance variants—a deletion of codon 210 within *PPO*, which is causal for resistance to PPO-inhibiting herbicides (21), and amplification of 5-enolpyruvylshikimate-3-phosphate synthase (*EPSPS*), which confers resistance to glyphosate herbicides (22). Natural-vs-agricultural  $F_{ST}$  (highly correlated with the CMH test statistic, **Fig S1**) at the PPO210 deletion, 0.21, is higher than anywhere else in the genome and is even stronger when calculated within-population pairs ( $F_{ST}$ = 0.27) (**Fig 2C**). Similarly, the EPSPS amplification is ranked 20th among genome-wide biallelic  $F_{ST}$  values, 0.14 (within-pair  $F_{ST}$ = 0.22), in support of herbicides as a foremost driver of agricultural adaptation.

How differences in selection relative to migration among environments may mediate agricultural adaptation is pivotal for understanding the consequences of agricultural selection in natural environments and the persistence of resistance mutations through time. For 6 common alleles, previously shown to be causal for conferring herbicide resistance (10), as well as the top 30 independent CMH outliers, we implemented a Wright-Fisher allele-frequency-based migration-selection balance model to infer the relative strength of selection favoring resistance alleles in agricultural environments versus selection favoring susceptible alleles in natural environments at equilibrium. While resistance alleles were at intermediate frequency in agricultural populations, ranging from 0.08 to 0.35, they were rarer in natural populations, with frequencies from 0.04 to 0.22, consistent with on-going migration from agricultural into natural environments balanced by selection against these alleles in the absence of herbicides (**Fig 2D**). Assuming these sites are at equilibrium, we inferred that the costs of resistance per migrant arriving in natural environments are stronger than the costs of susceptibility per migrant arriving in agricultural environments (per migrant costs: benefit ratio ranges from 1.09 for ALS653 to 4.2 for the PPO210 deletion, with a mean = 1.99; **Fig 2D**, **Table S3**). For the top 30 independent CMH outliers, the costs in natural environments were about equally likely to be stronger or weaker (12/28, 42%) than the benefits in agricultural environments, scaled to the migration rate (**Fig S2**). Thus, while substantial gene flow between agricultural and natural sites repeatedly introduces locally unfit alleles across environments, the spread of herbicide resistance alleles appears to be strongly constrained by their cost in herbicide-free, natural environments.

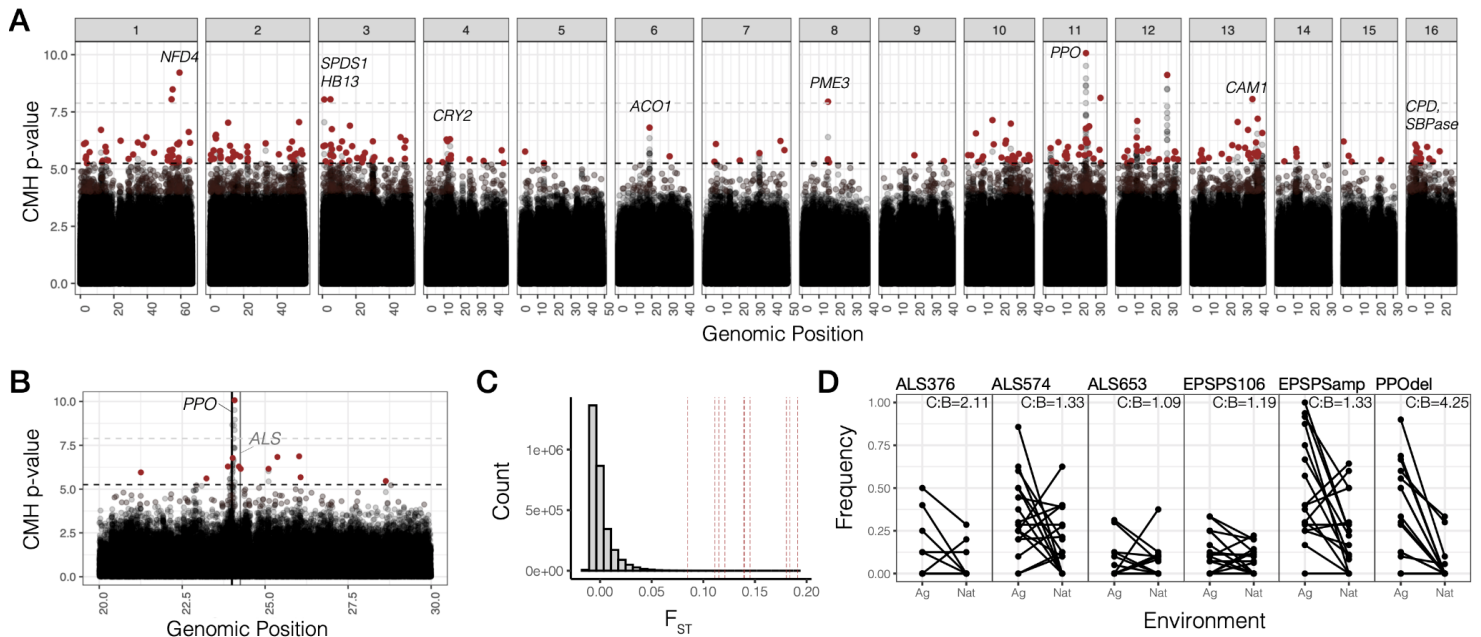

**Fig 2. Signals of contemporary agricultural adaptation, gene flow, and antagonistic selection across the genome in *A. tuberculatus*.** **A)** Results from Cochran–Mantel–Haenszel (CMH) tests for SNPs with consistent differentiation among environments across contemporary natural-agricultural population pairs. A 10% FDR threshold is indicated by the lower dashed horizontal black line, while the Bonferroni  $q$ -value  $< 0.1$  cutoff is shown by the upper dashed horizontal gray line. Red points indicate focal adaptive SNPs after aggregating linked variation ( $r^2 > 0.25$  within 1 Mb). Candidate agriculturally adaptive genes for peaks that are significant at a 10% FDR threshold shown. **B)** CHM results from the scaffold containing the most significant CMH p-value, corresponding to variants linked to the PPO210 deletion conferring herbicide resistance and to the nearby herbicide-targeted gene *ALS*. **C)** Distribution of  $F_{ST}$  values between all agricultural and natural samples for  $\sim 3$  million genome-wide SNPs (minor allele frequency  $> 0.05$ ). Vertical lines indicate  $F_{ST}$  values for the 10 candidate genes named in A. **D)** Pairwise frequency of six common herbicide resistance alleles across agricultural and natural habitats sampled in 2018; the first four are nonsynonymous variants in *ALS* and *EPSPS*, the *EPSPSamp* is a 10 Mb-scale amplification that includes *EPSPS*, and the last one is an in-frame single-codon deletion in *PPO* (each dot represents on average  $\sim 5$  individuals). Per migrant natural cost: agricultural benefit ratio relative to migration (C:B) is shown in the top right corner of each locus-specific comparison of frequencies across population pairs.

### *Agriculturally-adaptive alleles change rapidly with intensified regimes*

With a strong set of agriculture-associated alleles (251 loci after aggregating linked SNPs), we searched for signatures of temporal evolution using newly collected whole genome sequence data from a set of historical samples ( $n=108$ ) dating back to 1828, collected from natural, agricultural, and disturbed environments (**Fig 1**). Of the 165 loci for which we had sufficient information in the historical SNP set (sequenced to 10x coverage on average), 151 were segregating with the same reference/alternate allele combination, and only three were invariant. To model allele frequency change through

time on these loci, we implemented logistic regressions of genotypes (within individual allele frequencies) at each locus on collection year, where the slope of the logit-transform is equivalent to the strength of selection ( $s$ ). Because our historical collections sampled both natural and human-mediated environments through time, we were able to compare allele frequency trajectories and selection across environments.

Consistent with the rapid change in land use and farming practices in the recent past, the frequency of these 154 contemporary agricultural alleles has increased substantially over the last two centuries. Whereas in present-day natural environments agriculturally-adaptive alleles have increased by 6% on average since 1870, the earliest time point at which we have collections across environment types, these same alleles have increased by 22% in disturbed and agricultural environments (**Fig 3A**). This observed change greatly exceeds the expected change over this time period, under null processes (drift, migration, and selection) (null 95% interquartile range for allele frequency change in agricultural and disturbed sites = [3.3, 7.9%]; for change in natural sites = [-2.7, 2.0.%]). We generated these null expectations by randomly sampling the same number of observed loci across the genome and calculating their allele frequency change through time, where each of the 1000 randomized sets matched the frequency distribution observed for extant agricultural alleles (**Fig S4**) and were constrained to alleles across the genome that were at a higher frequency in agricultural compared to natural habitats. These randomizations were performed separately across environment types.

The considerable increase in frequency of these alleles across environments corresponds to remarkably strong selection even when estimated over century-long time periods. The 154 agriculture-associated alleles collectively exhibit  $\tilde{s} = 0.011$  since the 1870s in agricultural and disturbed habitats but exhibit much weaker selection,  $\tilde{s} = 0.0028$ , in natural habitats (agricultural and disturbed null interquartile range = [0.0013, 0.0034]; natural null interquartile range = [-0.0009, 0.0009]). The range of selection estimated across loci varies between -0.098 and 0.075 in natural habitats, and -0.045 and 0.186 in agricultural and disturbed habitats (**Fig 3B**, **Fig S5**). The top 15 agriculture-associated alleles that have experienced the strongest, significant selection over the last ~150 years include SNPs that map near *PPO*, *ACO1*, *CCB2*, *WRKY13*, *BPL3*, and *ATPD* (**Table S3**). We find that both the total frequency change of agriculture-associated alleles and the estimated strength of selection in agricultural and disturbed environments are positively correlated with the extent of contemporary linkage disequilibrium around these loci (the number of SNPs with  $r^2 > 0.25$  within 1Mb) (frequency change:  $F = 5.16$ ,  $p = 0.024$ ; strength of selection:  $F = 3.99$ ,  $p = 0.048$ ; **Fig S6**), consistent with theoretical expectations for the genomic signatures around alleles that have recently been impacted by positive selection (23, 24).

Along with evidence of much stronger selection and frequency change of agriculturally adaptive alleles in agricultural versus natural environments over the last 150 years, we find that the trajectory of these alleles among environments varies considerably through time (**Fig 3C**, **Fig S7**). While extant pairs of agricultural and natural populations are differentiated by 18% at these loci, this decreases as we look further back in time, so that around 1900, these alleles still had equal frequencies in both environments (predicted 1900 frequency in agricultural and disturbed sites = 41.9% [SE=2.7%], predicted 1900 frequency in natural sites = 38.6% [SE=2.7%]) (**Fig 3D**). Moreover, when we split out

samples into those that predate or are subsequent to the intensification of agriculture during the Green Revolution, we find that the increase in frequency of agricultural alleles was negligible in agricultural and disturbed environments before the 1960s (predicted 1870-1960 change = 0.005), with the subsequent change near completely accounting for the observed rise in frequency of the alleles more common today in agricultural environments (predicted 1960-2018 change = 0.219, versus total 2018-1870 change = 0.221) (**Fig 3C**). Corresponding estimates of selection by logistic regression using only data from before 1960 shows no evidence of selection on these loci in disturbed and agricultural ( $\tilde{s} = 0.0008$ , null interquartile range = [-0.0022,0.0010]) or in natural habitats ( $\tilde{s} = 0.0003$ , null interquartile range = [-0.002,0.002]). However, samples collected subsequent to 1960 reflect a dramatic shift in selection—a collective  $\tilde{s} = 0.027$  in disturbed and agricultural environments and a collective  $\tilde{s} = 0.014$  in natural environments (ag null interquartile range = [0.0032,0.0098]); nat null interquartile range = [-0.0028,0.0027]) (**Fig 3C; Fig S8**). Together, these results suggest that while most contemporary agricultural alleles were present in historical populations, that these alleles only became associated with agricultural and human-managed sites over the last century, on timescales and rates consistent with the rapid uptake and intensification of agrochemicals, controlled irrigation, and mechanization in agriculture.

The historical trajectory of known herbicide resistance alleles epitomizes extreme selection over the last 50 years (**Fig 3D**). Five out of seven known herbicide resistance loci present in our contemporary collection are absent from our historical samples, consistent with the suggested importance of resistance adaptation from *de novo* mutation (25, 26). Only three out of 108 historical samples show variation for herbicide resistance, two samples homozygous for resistance at ALS574 and one heterozygous for resistance at ALS122—all of which were sampled after the onset of herbicide applications in the 1960s (**Fig 3D**). Since 1960, we find that these seven known resistance alleles in our contemporary samples have collectively experienced selection of  $\tilde{s} = 0.099$  ( $Z = 2.11$ ,  $p = 0.035$ ) per year—ranging from  $s > 0.097$  for PPO210,  $s > 0.057$  for EPSPS106, and  $s > 0.044$  for ALS574 to no evidence of selection on ALS122 and ALS197 (**Fig 3D; Table S3**). As expected, selection has been particularly strong on these alleles in disturbed and agricultural environments ( $\tilde{s} = 0.1003$ ,  $Z = 2.121$ ,  $p = 0.034$ ), but selection on these known resistance alleles remains high when estimated from samples taken over time in natural environments ( $\tilde{s} = 0.071$ ,  $Z = 1.912$ ,  $p = 0.056$ ), where presumably the alleles have been recurrently introduced by migration from agricultural sites.



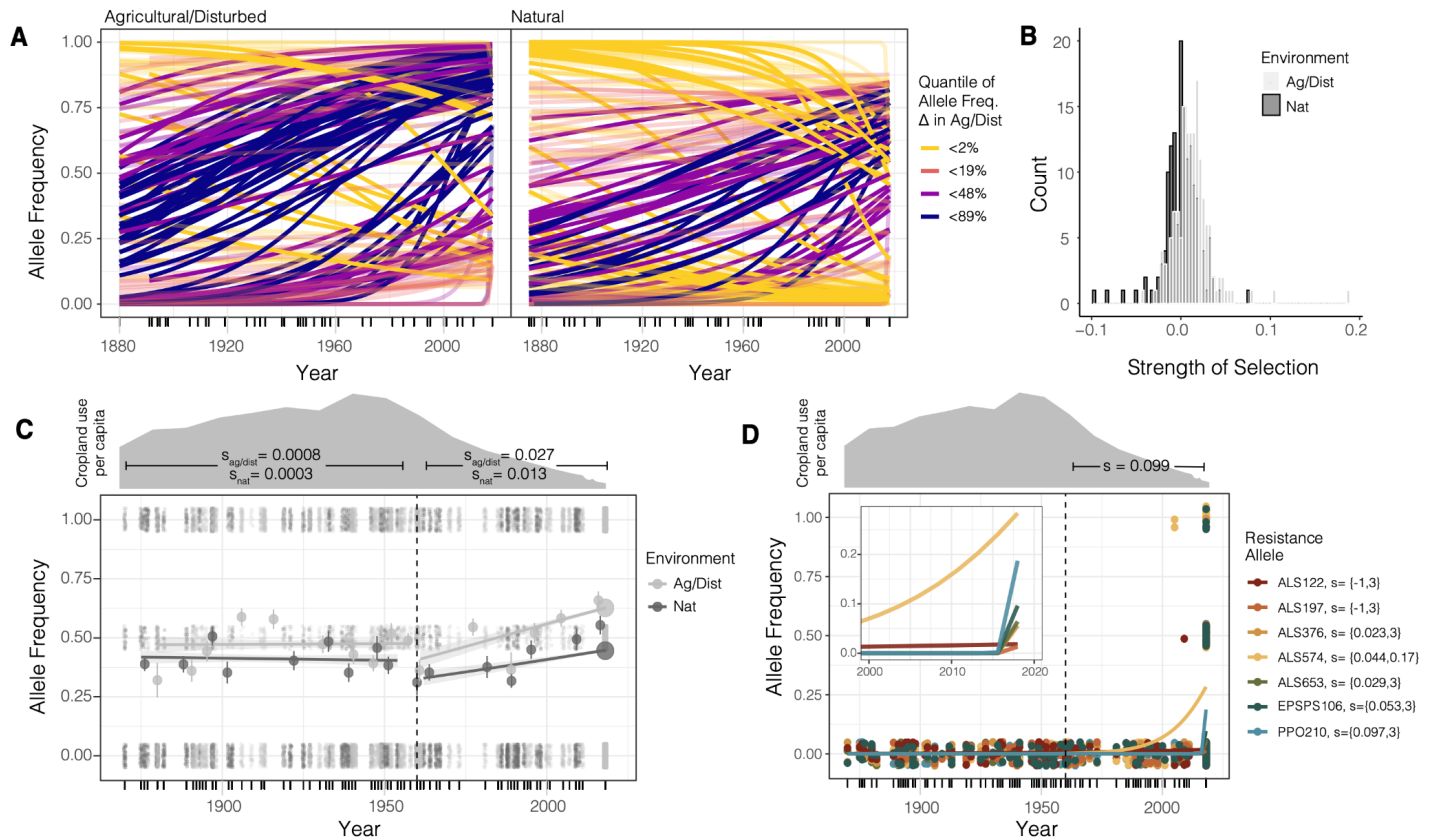

**Fig 3. Genomic signatures of agricultural adaptation through time.** **A)** Agricultural allele frequency trajectories for each locus, in agricultural and disturbed habitats (left), and natural habitats (right). Trajectories coloured by the quantile of frequency change in agricultural and disturbed habitats. Transparent lines indicate those with non-significant evidence of selection at  $\alpha=0.05$  after FDR=10% correction. **B)** The strength of selection on agricultural alleles for each locus in natural (dark gray) and agricultural and disturbed (light gray) habitats between 1870 and 2018. **C)** Agricultural allele frequency trajectories in each environment type, before and after the start of agricultural intensification in 1960. Vertical dashed line represents an inferred breakpoint in the data in a segmented regression. Environmental regression lines represent logistic fits to data that either predate or are subsequent to 1960. Large circles represent 2020 moving averages (over both loci and individuals) of allele frequencies, whereas dots represent raw genotype data for each locus and sample from which the allele frequency trajectory is estimated. Cropland use per capita in North America data from (1), rescaled by use in 1600. **D)** The trajectory of alleles at known herbicide resistance loci through time, fit by logistic regression for each of the seven alleles present in our contemporary data. Dots represent genotypes for each historical and contemporary sample at each herbicide resistance locus. 95% credible interval of the maximum likelihood estimate of selection between 1960-2018 provided in the legend for each resistance allele.

### *Concurrent temporal shifts in ancestry underlie agricultural adaptation*

Finally, we explored whether historical demographic change over the last two centuries has played a role in agricultural adaptation. Early taxonomy described two different *A. tuberculatus* varieties as separate species, with few distinguishing characteristics (seed

dehiscence and tepal length (8)). Sauer's 1955 revision of the genus, which used herbarium specimens to gauge the distribution and migration of congeners over the last two centuries (27), led him to describe an expansion of the southwestern var. *rudis* type (at the time, *A. tamariscinus* (Sauer)) northeastward into the territory of var. *tuberculatus* (*A. tuberculatus* (Sauer)), sometime between 1856-1905 and 1906-1955. Our sequencing of over 100 herbarium samples dating back to 1828, combined with nearly 200 contemporary sequences, allowed us to directly observe the change in the distribution of these two ancestral types, adding resolution to Sauer's morphological observations of the species' contemporary range shifts at a genome-wide level and over more recent timescales.

Range-wide, we see clear shifts in the distribution of var. *rudis* ancestry based on faststructure inference at  $K=2$  (**Fig S9**) across three-time spans, 1830-1920, 1920-1980, and 1980-2018 (timespan:  $F = 5.47$ ,  $p = 0.0045$ ), and particularly so in the East (timespan x longitude:  $F = 5.49$ ,  $p = 0.0045$ ), consistent with a recent expansion of var. *rudis* ancestry (**Fig 4A**). Furthermore, we see strong state and province-specific shifts in ancestry through time in our historical sequences (time span by state interaction:  $F = 4.22$ ,  $p = 7 \times 10^{-5}$ ), highlighting not only the shift of var. *rudis* eastwards (with increases through time in Ontario, Ohio, Illinois, and Missouri) but also the very recent introduction of var. *tuberculatus* ancestry into the most eastwards part of the range in Kansas (**Fig 4B**). *A. tuberculatus* demography thus appears to have been drastically influenced by human-mediated landscape change over the last two centuries, consistent with the massive recent expansion of effective population size we have previously inferred over this same timeframe (26). That this shift has been most notable over the last 40 years is further consistent with the timescale of rampant herbicide resistance evolution within the species (10, 26, 28), suggesting selection on resistance may facilitate the colonization of var. *rudis* ancestry outside its historical range. Along these lines, we find this contemporary expansion has facilitated the sorting of var. *rudis* ancestry across environments (a longitude by time span by environment interaction:  $F = 5.13$ ,  $p = 4 \times 10^{-5}$ ; **Fig 4C**), with increasing overrepresentation of var. *rudis* ancestry in agricultural and disturbed environments in the eastern portion of the range through time, as previously suggested (11).

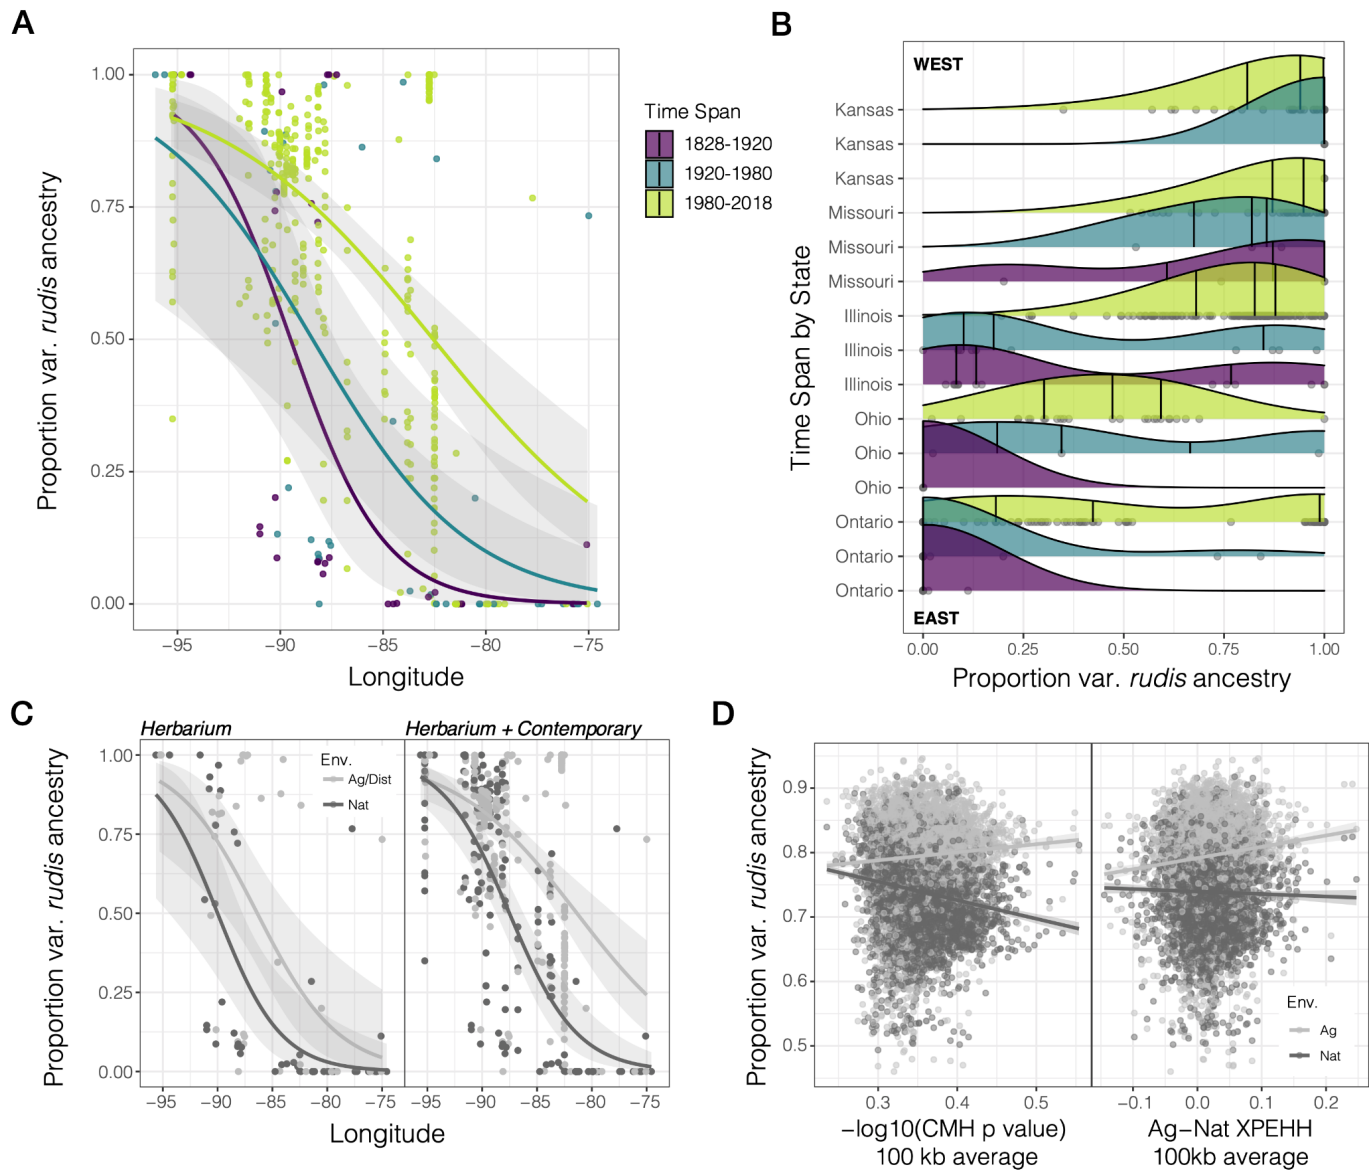

**Fig 4. Temporal shifts in the distribution of var. *rudis* ancestry have facilitated polygenic agricultural adaptation.** **A)** Longitudinal clines in individual-level var. *rudis* ancestry over three timespans, illustrating the expansion of var. *rudis* ancestry eastwards over the last two centuries. **B)** The distribution of individual-level var. *rudis* ancestry by state and through time, illustrating state-specific changes in ancestry. Vertical lines represent first, second, and third quantiles of ancestry within each timespan and state. Timespans indicated in A) **C)** Increasing sorting of individual-level var. *rudis* ancestry into agricultural environments on contemporary timescales. **D)** Environment-specific metrics of selection (CMH p-value and cross-population extended haplotype homozygosity (XPEHH)) across the genome in 100 kb windows positively correlate with var. *rudis* ancestry in agricultural, but not natural habitats.

To investigate whether agricultural adaptation has preferentially favored var. *rudis* ancestry, we reconstructed fine-scale ancestry across the genome. Based on analyses in 100 kb windows, we find a least squares mean of 5.6% more var. *rudis* ancestry genome-

wide in agricultural environments compared to the adjacent natural habitat (**Fig S10**). The environment-specific proportion of var. *rudis* ancestry is not only positively correlated with recombination rate ( $F = 16.67$ ,  $p = 4.5 \times 10^{-5}$ ) and gene density ( $F = 5.85$ ,  $p = 0.016$ ) but also with SNP and haplotype-based evidence of environment-specific selection. Agricultural, but not natural populations, have an excess of cross-population haplotype homozygosity (agricultural vs natural XPEHH) and within-pair environmental differentiation (CMH p-value) in genomic regions of high var. *rudis* ancestry (Env x XPEHH:  $F=9.34$ ,  $p=0.002$ ; Env x CMH:  $F=99.70$ ,  $p < 10^{-16}$ ; **Fig 4D**), implying that ancestry composition genome-wide in large part determines the extent of polygenic agricultural adaptation. Together, these findings suggest that the expansion of var. *rudis* ancestry across the range, particularly in the last 40 years, has facilitated adaptation to novel agricultural selective pressures through providing preadapted genetic variation.

In summary, agricultural adaptation in *A. tuberculatus*, a native plant in North America, has occurred over extremely rapid timescales, facilitated by range shifts in response to the agriculturalization of its native habitat. The human-mediated expansion of the southern lineage of the species northeastwards since the later half of the 20th century has introduced new genetic variation across the genome on which selection in agricultural settings could act. Through our paired sampling design, we identified 251 independent SNPs across 240 genes that are implicated in agricultural adaptation; these genes tend to be enriched for expanded southwestern ancestry, with functions affecting growth, development, abiotic tolerance, and herbicide resistance. Concurrent with the intensification of agriculture, the prevalence of agricultural alleles has increased rapidly over just the last 60 years, in agricultural environments by nearly 3% per year, and even in natural sites by more than 1% per year. The first empirical estimates of selection coefficients for herbicide resistance provided here—10% per year range-wide over a 60 year period—emphasizes the long lasting impact of selection on genetic variation even across heterogeneous environments. Modern, industrial agriculture thus imposes strengths of selection rarely observed in the wild.

These results highlight that anthropogenic change not only leads to the formation of new habitats but also provides an opportunity for range expansion that may facilitate and feedback with local adaptation, reshaping genetic variation for fitness within native species.

## References and Notes

1. K. Klein Goldewijk, A. Beusen, J. Doelman, E. Stehfest, Anthropogenic land use estimates for the Holocene – HYDE 3.2. *Earth Syst. Sci. Data*. **9**, 927–953 (2017).
2. T. G. Benton, J. A. Vickery, J. D. Wilson, Farmland biodiversity: is habitat heterogeneity the key? *Trends in Ecology & Evolution*. **18** (2003), pp. 182–188.
3. D. Kleijn, F. Kohler, A. Báldi, P. Batáry, E. D. Concepción, Y. Clough, M. Díaz, D. Gabriel, A. Holzschuh, E. Knop, A. Kovács, E. J. P. Marshall, T. Tschardtke, J. Verhulst, On the relationship between farmland biodiversity and land-use intensity in Europe. *Proc. Biol. Sci.* **276**, 903–909 (2009).
4. C. Mann, Reseeding the Green Revolution. *Science* (1997), doi:10.1126/science.277.5329.1038.
5. P. L. Pingali, Green revolution: impacts, limits, and the path ahead. *Proc. Natl. Acad. Sci. U. S. A.* **109**, 12302–12308 (2012).
6. D. Pimentel, H. Lehman, *The Pesticide Question: Environment, Economics and Ethics* (Springer Science & Business Media, 1993).
7. F. Zabel, R. Delzeit, J. M. Schneider, R. Seppelt, W. Mauser, T. Václavík, Global impacts of future cropland expansion and intensification on agricultural markets and biodiversity. *Nat. Commun.* **10**, 2844 (2019).
8. J. Sauer, REVISION OF THE DIOECIOUS AMARANTHS. *Madroño*. **13**, 5–46 (1955).
9. M. Costea, S. E. Weaver, F. J. Tardif, The Biology of Invasive Alien Plants in Canada. 3. *Amaranthus tuberculatus* (Moq.) Sauer var. *rudis* (Sauer) Costea & Tardif. *Can. J. Plant Sci.* **85**, 507–522 (2005).
10. P. J. Tranel, Herbicide resistance in *Amaranthus tuberculatus*†. *Pest Manag. Sci.* **77**, 43–54 (2021).
11. J. M. Kreiner, A. Caballero, S. I. Wright, J. R. Stinchcombe, Selective ancestral sorting and de novo evolution in the agricultural invasion of *Amaranthus tuberculatus*. *Evolution* (2021), doi:10.1111/evo.14404.
12. W. Moeder, O. Del Pozo, D. A. Navarre, G. B. Martin, D. F. Klessig, Aconitase plays a role in regulating resistance to oxidative stress and cell death in *Arabidopsis* and *Nicotiana benthamiana*. *Plant Mol. Biol.* **63**, 273–287 (2007).
13. J. V. Cabello, R. L. Chan, The homologous homeodomain-leucine zipper transcription factors HaHB1 and AtHB13 confer tolerance to drought and salinity stresses via the induction of proteins that stabilize membranes. *Plant Biotechnol. J.* **10**, 815–825 (2012).

14. S. Guénin, J. Hardouin, F. Paynel, K. Müller, G. Mongelard, A. Driouich, P. Lerouge, A. R. Kermode, A. Lehner, J.-C. Mollet, J. Pelloux, L. Gutierrez, A. Mareck, AtPME3, a ubiquitous cell wall pectin methylesterase of *Arabidopsis thaliana*, alters the metabolism of cruciferin seed storage proteins during post-germinative growth of seedlings. *J. Exp. Bot.* **68**, 1083–1095 (2017).
15. S. Zhou, L. Jia, H. Chu, D. Wu, X. Peng, X. Liu, J. Zhang, J. Zhao, K. Chen, L. Zhao, *Arabidopsis* CaM1 and CaM4 Promote Nitric Oxide Production and Salt Resistance by Inhibiting S-Nitrosoglutathione Reductase via Direct Binding. *PLoS Genet.* **12**, e1006255 (2016).
16. C. Dai, Y. Lee, I. C. Lee, H. G. Nam, J. M. Kwak, Calmodulin 1 Regulates Senescence and ABA Response in *Arabidopsis*. *Front. Plant Sci.* **9**, 803 (2018).
17. H. Guo, H. Yang, T. C. Mockler, C. Lin, Regulation of flowering time by *Arabidopsis* photoreceptors. *Science.* **279**, 1360–1363 (1998).
18. T. Mockler, H. Yang, X. Yu, D. Parikh, Y.-C. Cheng, S. Dolan, C. Lin, Regulation of photoperiodic flowering by *Arabidopsis* photoreceptors. *Proc. Natl. Acad. Sci. U. S. A.* **100**, 2140–2145 (2003).
19. W. Wang, X. Lu, L. Li, H. Lian, Z. Mao, P. Xu, T. Guo, F. Xu, S. Du, X. Cao, S. Wang, H. Shen, H.-Q. Yang, Photoexcited CRYPTOCHROME1 Interacts with Dephosphorylated BES1 to Regulate Brassinosteroid Signaling and Photomorphogenesis in *Arabidopsis*. *Plant Cell.* **30**, 1989–2005 (2018).
20. J. Li, Y. Li, S. Chen, L. An, Involvement of brassinosteroid signals in the floral-induction network of *Arabidopsis*. *J. Exp. Bot.* **61**, 4221–4230 (2010).
21. F. E. Dayan, P. R. Daga, S. O. Duke, R. M. Lee, P. J. Tranel, R. J. Doerksen, Biochemical and structural consequences of a glycine deletion in the  $\alpha$ -8 helix of protoporphyrinogen oxidase. *Biochimica et Biophysica Acta (BBA) - Proteins and Proteomics.* **1804**, 1548–1556 (2010).
22. H. M. Cockerton, S. S. Kaundun, L. Nguyen, S. J. Hutchings, R. P. Dale, A. Howell, P. Neve, Fitness cost associated with enhanced EPSPS gene copy number and glyphosate resistance in an *Amaranthus tuberculatus* population. *Cold Spring Harbor Laboratory* (2021), p. 2021.01.09.426028.
23. M. Przeworski, The signature of positive selection at randomly chosen loci. *Genetics.* **160**, 1179–1189 (2002).
24. Y. Kim, R. Nielsen, Linkage disequilibrium as a signature of selective sweeps. *Genetics.* **167**, 1513–1524 (2004).
25. N. J. Hawkins, C. Bass, A. Dixon, P. Neve, The evolutionary origins of pesticide resistance. *Biol. Rev. Camb. Philos. Soc.* (2018), doi:10.1111/brv.12440.

26. J. M. Kreiner, G. Sandler, A. J. Stern, P. J. Tranel, D. Weigel, J. Stinchcombe, S. I. Wright, Repeated origins, widespread gene flow, and allelic interactions of target-site herbicide resistance mutations. *Elife*. **11**, e70242 (2022).
27. J. Sauer, Recent Migration and Evolution of the Dioecious Amaranths. *Evolution*. **11**, 11–31 (1957).
28. P. J. Tranel, C. W. Riggins, M. S. Bell, A. G. Hager, Herbicide resistances in *Amaranthus tuberculatus*: a call for new options. *J. Agric. Food Chem.* **59**, 5808–5812 (2011).
29. S. M. Latorre, P. L. M. Lang, H. A. Burbano, R. M. Gutaker, Isolation, Library Preparation, and Bioinformatic Analysis of Historical and Ancient Plant DNA. *Curr Protoc Plant Biol.* **5**, e20121 (2020).
30. S. Chen, Y. Zhou, Y. Chen, J. Gu, fastp: an ultra-fast all-in-one FASTQ preprocessor. *Bioinformatics*. **34** (2018), pp. i884–i890.
31. J. M. Kreiner, D. A. Giacomini, F. Bemm, B. Waithaka, J. Regalado, C. Lanz, J. Hildebrandt, P. H. Sikkema, P. J. Tranel, D. Weigel, J. R. Stinchcombe, S. I. Wright, Multiple modes of convergent adaptation in the spread of glyphosate-resistant *Amaranthus tuberculatus*. *Proc. Natl. Acad. Sci. U. S. A.* **116**, 21076–21084 (2019).
32. A. Peltzer, G. Jäger, A. Herbig, A. Seitz, C. Kniep, J. Krause, K. Nieselt, EAGER: efficient ancient genome reconstruction. *Genome Biol.* **17**, 60 (2016).
33. A. Ginolhac, M. Rasmussen, M. T. P. Gilbert, E. Willerslev, L. Orlando, mapDamage: testing for damage patterns in ancient DNA sequences. *Bioinformatics*. **27**, 2153–2155 (2011).
34. S. Purcell, B. Neale, K. Todd-Brown, L. Thomas, M. A. R. Ferreira, D. Bender, J. Maller, P. Sklar, P. I. W. de Bakker, M. J. Daly, P. C. Sham, PLINK: a tool set for whole-genome association and population-based linkage analyses. *Am. J. Hum. Genet.* **81**, 559–575 (2007).
35. D. M. Emms, S. Kelly, OrthoFinder: solving fundamental biases in whole genome comparisons dramatically improves orthogroup inference accuracy. *Genome Biol.* **16**, 157 (2015).
36. S. F. Altschul, W. Gish, W. Miller, E. W. Myers, D. J. Lipman, Basic local alignment search tool. *J. Mol. Biol.* **215**, 403–410 (1990).
37. Z. A. Szpiech, R. D. Hernandez, selscan: an efficient multithreaded program to perform EHH-based scans for positive selection. *Mol. Biol. Evol.* **31**, 2824–2827 (2014).
38. O. Delaneau, J.-F. Zagury, J. Marchini, Improved whole-chromosome phasing for disease and population genetic studies. *Nat. Methods*. **10**, 5–6 (2013).
39. A. Raj, M. Stephens, J. K. Pritchard, fastSTRUCTURE: variational inference of population

structure in large SNP data sets. *Genetics*. 197, 573–589 (2014).

40. B. Pasaniuc, S. Sankararaman, G. Kimmel, E. Halperin, Inference of locus-specific ancestry in closely related populations. *Bioinformatics*. 25, i213–21 (2009).

**Acknowledgements:** We appreciate the pivotal contribution of numerous herbaria towards this research, especially the help of Eric Knox at Dean Herbarium at Indiana State University, Jamie Lynn Minnaert-Grote at the University of Illinois, Tedesse Mesfin at the University of Ohio Herbarium, Anton Reznicek at the University of Michigan Herbarium, Jim Solomon at the Missouri Botanical Gardens, Caleb Morse at the McGregor Herbarium at Kansas State University, Tyler Smith and Song Wang at Agricultural and Agrifood Canada, and Deb Metsger and Tim Dickinson at the Royal Ontario Museum. We thank the Whitlock lab (University of British Columbia), as well as Aneil Agrawal and Tyler Kent (University of Toronto) for input on the work; Christa Lanz and Rebecca Schwab (Max Planck Institute) for coordinating sequencing of herbarium samples; Ella Reiter (University of Leipzig) for scheduling and coordinating logistics for clean room facility work; and Patricia Lang, Sonja Kersten and Heike Budde (Max Planck Institute) for advice on molecular protocols troubleshooting.

**Funding:** JMK was supported by the Biodiversity Research Institute at the University of British Columbia and a Killam Fellowship. SIW was supported by a NSERC discovery grant and a Canada research chair. JRS was supported by a NSERC discovery grant. SML, HAB and DW were supported by the Max Planck Society.

**Author Contributions:** JMK, JRS, and SIW conceptualized the paired sampling design, JMK, HAB, DW, JRS, and SIW conceptualized the use of herbarium data, JMK performed contemporary collections and curated the herbarium samples, SML and HAB conceptualized and designed the molecular work with herbarium specimens, SML coordinated the clean room facility work, JMK and SML performed DNA extraction and library preparations of herbarium tissue, SML oversaw the sequencing of herbarium specimens. JMK performed analyses with input from SPO, SIW, and JRS. SPO wrote the migration-selection and maximum likelihood models. JMK wrote and revised the paper with inputs from all authors.

**Competing interests:** The authors declare that they have no competing interests.

**Data and materials availability:** All novel sequence data will be archived on SRA, while scripts and accompanying metadata will be archived on Github and Dryad upon acceptance.



## Supplementary Materials

### Materials & Methods

#### *Herbarium collections*

In 2019, we obtained 10 mg tissue collections of herbarium specimens from 7 herbaria across Canada and the United States and one governmental organization: the Royal Ontario Museum Herbarium, the Museum of Biological Diversity at Ohio State University Herbarium, the Dean Herbarium at Indiana State University, the Michigan State University Herbarium, the Illinois Natural History Survey Herbarium, Missouri Botanical Gardens, The McGregor Herbarium at Kansas State University, and Agriculture and Agrifood Canada. We selected samples to have an even representation of habitats through time. Samples were classified as natural (n=54), agricultural (n=28), or disturbed (n=20) based on collectors' annotations on each plate: any reference to a cultivated field was treated as an 'agricultural' collection; general environmental descriptions such as dry grassland or riverbank was treated as a 'natural' collection; and reference to disturbed soil, railroad tracks, or manicured or managed land was treated as a 'disturbed' collection. For inference of contemporary allele frequency and ancestry change through time, samples collected from disturbed habitats were grouped together with the agricultural category—in both of which waterhemp exists as a weed (**Table S5**). When geographic coordinates were not provided, we referred to the state, county, section, intersection, and landmark descriptions to infer the geographic coordinate of a given sample. In total, we collected samples from 172 specimens, 108 of which were selected for whole-genome sequencing.

#### *Herbarium DNA extractions & library preparations*

The work was performed in the ancient DNA lab at the University of Tübingen. For DNA extraction of the herbarium samples, we followed basic protocol 1 outlined in (29). Briefly, under sterile conditions, ~10 mg of each sample were ground and incubated with N-phenacylthiazolium bromide (PTB)-based mix overnight to lyse DNA. After a shredding step with QIAshredder spin columns, DNA was purified and eluted with DNAeasy Mini spin columns. Sequencing libraries were prepared using the basic protocol 2 outlined in (29), performing blunt-end repair, adapter ligation, a fill-in reaction, indexing, and finally PCR amplification (10 cycles) and a cleaning step. The libraries were sequenced on an Illumina NovaSeq instrument on a single flow cell. The sequencing run produced ~3,442 Gb data, an average of 32 Gb per sample.

#### *Mapping, damage correction, SNP calling and filtering*

We removed adapters, polyQ tails, and merged reads from herbarium sequencing reads using fastp (30). Because of the small fragment size of historical DNA, this resulted in a sizable loss of sequence coverage, from 46X coverage to a mean of 11X coverage. On

average, 89% of merged reads mapped to the female reference genome from (31), suggesting low rates of contamination by exogenous DNA. Finally, we performed de-duplication of merged reads with DeDup (32), which is optimized for merged paired-end sequencing data. This resulted in a final mean per-sample coverage of 9.7X.

We used the program MapDamage (33) to quantify damage patterns in the historical DNA. The fraction of C deamination, which leads to C-to-T substitutions, was low, at the first base ~2% on average across samples, barely inflated above the C-to-T substitution rate across the rest of the reads (**Fig S3**). Nonetheless, the fraction of C-to-T substitutions at the first base was positively correlated with the age of the samples (**Fig S3**). We thus used MapDamage to rescale mapping quality scores to take into account the patterns of DNA damage. We called SNPs with freebayes (v1.3.2) in 100 kb regions in parallel across the genome, merged, and then filtered SNPs based on quality (QUAL > 30) and missing data (< 0.30).

Herbicide resistance alleles in herbarium samples were identified based on known locations of non-synonymous substitutions within ALS and EPSPS. Initially, two genotype calls from herbarium samples that predated the onset of ALS herbicide use in the 1950s, showed standing variation for resistance at ALS574 and ALS122: one individual heterozygous for Trp-574-Leu collected in 1930 from a sandy agricultural field in St. Louis, Missouri, USA (HB0973); and another individual heterozygous for Ala-122-Ser collected in 1895 from a corn field in Fayette, Ohio, USA (HB0914). Upon further inspection, read-level support for resistance alleles was low with the allelic-bias at these genotype calls being highly skewed (reference to alternate ratio = 1:9 and 2:18, respectively). Similarly, one individual collected in 1967 from the Bottom of Maumee River, Ohio (HB0977) was heterozygous for ALS122, but the alternate resistance allele had support at only one read (reference to alternate ratio = 1:7). We subsequently dropped these genotype calls from analyses of selection on herbicide resistance alleles through time.

#### *Metrics of differentiation across Environments: CMH, $F_{ST}$ , & XPEHH*

We used the 7,262,599 genome-wide high-quality SNPs called from contemporary agricultural-natural paired populations (n=187 individuals total from 17 pairs of populations, 34 populations in total) from (11) (Fig 1). Previously, these data had been only used for genome-wide PCA and faststructure based individual-level ancestry estimates. To make use of our paired sampling design, we used plink (34) to perform a Cochran–Mantel–Haenszel test, testing an (environment by SNP | pair) effect after applying a minor allele frequency cutoff of 0.01. We identified candidate agriculturally-adaptive genes based on the nearest gene (bedtools closest) to each LD-clumped, FDR q-value < 0.1 SNP. We found the *Arabidopsis thaliana* orthologues of our *A. tuberculatus* genes with orthofinder (35). For genes where orthofinder found no *A. tuberculatus* orthologue and in which our annotation identified no orthologue in closely related species based on gene expression data, we used blastn (36) to perform a conclusive search for similar genes across species.

Additionally, we used plink to calculate Weir and Cockerham's  $F_{ST}$ , both between all natural and agricultural samples, and between environments within each population pair,

which we later averaged to obtain the mean pairwise  $F_{ST}$ . For calculation of  $F_{ST}$  at the EPSPS amplification, we recoded individuals as 0, 1, 2 based on copy number amplitude (<1.5, 1.5 < copies < 2.5, and >2.5, respectively). We used selscan (37) to calculate the cross-population extended haplotype homozygosity, after read-back and population-level phasing with Shapit2 (38), both of which required knowledge of recombination rates, which we supplied in the format of our imputed LD-based map from (31).

### Models of Migration-Selection Balance

We modeled migration-selection balance between natural and agricultural habitats in our contemporary data for 6 common target-site resistance alleles, based on a two-patch, allele-focused model. In each patch, we modeled the frequency of the resistance allele and the susceptible ( $x_S, x_R$  and  $y_S, y_R$ , respectively) from year to year as:

$$\begin{aligned}x_S^* &= x_S^2 W_{BB} + x_S x_R W_{Bb}, & x_R^* &= x_S x_R W_{Bb} + x_R^2 W_{bb} \\ y_S^* &= y_S^2 V_{BB} + y_S y_R V_{Bb}, & y_R^* &= y_S y_R V_{Bb} + y_R^2 V_{bb}\end{aligned}$$

where  $x_S^*$ ,  $y_S^*$  represent the frequency of the susceptible allele and  $x_R^*$ ,  $y_R^*$  represent the frequency of the resistance allele after a bout of selection in natural ( $x$ ) and agricultural ( $y$ ) sites within a generation. We then allowed for migration of surviving genotypes and modeled their frequency in the next generation as follows:

$$\begin{aligned}x'_S &= (1 - m_N) \left( \frac{x_S^*}{x_S^* + x_R^*} \right) + m_N \left( \frac{y_S^*}{y_S^* + y_R^*} \right), \\ x'_R &= (1 - m_N) \left( \frac{x_R^*}{x_S^* + x_R^*} \right) + m_N \left( \frac{y_R^*}{y_S^* + y_R^*} \right) \\ y'_S &= (1 - m_A) \left( \frac{y_S^*}{y_S^* + y_R^*} \right) + m_A \left( \frac{x_S^*}{x_S^* + x_R^*} \right), \\ y'_R &= (1 - m_A) \left( \frac{y_R^*}{y_S^* + y_R^*} \right) + m_A \left( \frac{x_R^*}{x_S^* + x_R^*} \right)\end{aligned}$$

where  $m_N$  and  $m_A$  represent immigration rates into natural and agricultural sites, respectively. Assuming additivity ( $h=0.5$ ) and that migration at the loci is much weaker than selection ( $m \ll s$ ), a given pair of populations is expected to approach a polymorphic equilibrium, where:

$$\frac{s_A}{m_A} = \frac{2(y'_S - x'_S)}{y'_S y'_R} \text{ in natural patches and } \frac{s_N}{m_N} = \frac{2(x'_R - y'_R)}{x'_S x'_R} \text{ in agricultural patches}$$

While it is not possible to solve for selection directly in the absence of data on migration rates, these formulae allow us to estimate the strength of divergence by inferring the strength of selection relative to migration in natural ( $\frac{s_N}{m_N}$ ) and agricultural ( $\frac{s_A}{m_A}$ ) environments, as presented in **Table S3**. The ratio of these metrics gives the ratio of the cost faced per migrant arriving in natural environments versus the benefit per migrant in

agricultural environments, assuming that the pair of populations is near equilibrium. We note that the approach to migration-selection balance occurs exponentially at a rate proportional to the selection coefficient (when  $m \ll s \ll 1$ ) and so should occur rapidly at sites under strong selection (**Supplemental Index 1**).

### *Logistic models of temporal allele frequency change*

We used CMH outliers from the contemporary paired population scan to investigate patterns of agricultural-allele frequency change over the last two centuries. We were interested in tracking independent allele frequency trajectories, so from the 403 SNPs with CMH p-values that exceeded 10% FDR correction ( $p < 6 \times 10^{-6}$ ), we performed a subsequent clumping step, effectively retaining a set of largely unlinked SNPs (**Fig S11**) that represent the most significant SNP in a particular region. Specifically, we used `plink --clump`, to find the most significant hit genome-wide, scan 1 Mb around it, and exclude any SNP from the resulting output that is in  $r^2 > 0.25$  with the focal SNP. This algorithm is repeated until all SNPs passing the genome-wide significance threshold have been clumped. This resulted in 251 loci that on average showed a 17.9% allele frequency difference between extant agricultural and natural environments. Because some of the alternate alleles across these loci were more frequent in natural environments, we redefined the alleles based on which one was more common in agricultural compared to natural sites.

We then found the intersection of these agriculture-associated alleles, identified in our contemporary paired collections, with the historical, filtered SNPs from the herbarium sequence data. 154 loci were present in the historical samples with the same reference/alternate allele combinations. We extracted a matrix of 0, 0.5, 1 values, representing the frequency of the agricultural allele for each locus within each individual, for samples from both our contemporary and historical collections. Combining these individual agricultural allele frequencies at each locus across historical and contemporary datasets, we then performed a logistic regression in R (`glm` function, `family="binomial"`) of genotype on collection year, separately on samples from either natural or agricultural environments. From each logistic regression, we extracted the logit-transformed slope (selection coefficient,  $s$ ), p-value, and standard error, as well as the predicted value (allele frequency) at 1870 and 2018, representing the minimum sample year and maximum sample year. While we have samples dating back to 1828, we constrained this analysis to samples collected after 1870, as the density of samples before then is low ( $n=4$ ), with no representation of samples from agricultural environments.

The total allele frequency change at each locus was calculated by taking the difference between the predicted frequency of the allele in 2018 and 1870. We merged the output of these locus-specific logistic regressions in agricultural environments, with both SNP and haplotype-based statistics from these same individuals to identify contemporary correlates of the magnitude of allele frequency change and selection through time. Specifically, we examined how well contemporary recombination rate, XPEHH, the CMH p-value, the number of SNPs in linkage ( $r^2 > 0.25$ ) with the focal SNP ( $< 1\text{Mb}$ ; i.e. number of SNPs in a clump), and the distance between linked SNPs, explained both the total allele frequency change and the estimated strength of selection (**Fig S6**).

We also performed a separate set of analyses, where a logistic regression was used to analyze the trajectory of all agricultural alleles or known herbicide resistance alleles at once, first across samples from natural environments and then for samples from agricultural and disturbed environments ('genotype ~ year + locus'; **Fig 3D**). We further partitioned samples in each environment to those that predate or are subsequent to the 1960s, to infer the importance of the intensification of agriculture and herbicides in shaping the strength of selection on contemporary agricultural loci. For each of the four logistic regressions ran on these partitioned sets of data, the slope of the year term represents a joint estimate of the strength of selection for agricultural alleles, between 1870-1960 or 1960-2018, in natural or agricultural environments. We refer to this joint estimate of selection at multiple loci as  $s$ .

To test whether a comparison of selection before and after the 1960's was statistically supported, we also compared our full model analyzing temporal signatures of allele frequency change between 1870-1960 to one that fits either two or three logistic regression lines between that time frame (i.e. a segmented logistic regression). A segmented logistic regression with two breakpoints provides the best fit to our data, compared to a model with either one or no breakpoints (two-break segmented AIC=54360.55, one-break segmented AIC =54437.66, non-segmented AIC=54444.67), and converges on 1913 and 1961 breakpoints, the later supporting a priori hypotheses and our interest in interrogating signals before and after the start of the green revolution in 1960 (**Fig 3D**).

We designed a randomization test based on observed allele frequency changes across the genome to obtain an expected distribution under null processes (drift, migration, and selection). In particular, we were interested in quantifying the potential bias in higher frequency agricultural alleles having the leeway to change more through time, as compared to a set of lower frequency alleles. We thus randomly sampled 154 loci from our contemporary collections (the same number as our observed clumped and historically matched set of agricultural alleles), 1000x across the genome, exactly matching the frequency distribution observed for extant agricultural alleles, first in extant agricultural and then in extant natural environments. To emphasize, this randomization was done independently in each environment, such that the alleles sampled to match the extant agricultural-allele frequency distribution in agricultural environments in one iteration were different from the alleles sampled to match the frequency distribution in natural environments (**Fig S4**). To account for the ascertainment bias in our set of putatively agriculturally adaptive alleles—finding alleles that show the greatest excess of allele frequency in agricultural compared to natural environments—we further constrained these randomizations to alleles across the genome which were at greater frequency in agricultural than in natural environments. On each of the 1000 randomizations within each environment, we then performed the same analyses as above: matching these alleles in our historical samples, producing a matrix of genotype data for both contemporary and historical sets, and performing a logistic regression for each locus, as well as logistic regression on all loci at once, for either samples from natural or agricultural environments, and for those that either preceded or were subsequent to 1960. For the 1000x randomizations within agricultural and natural environments, we then computed the 2.75 and 97.25% quantiles ("null 95% interquantile range") of the statistics of interest (total allele frequency change and selection coefficients) to compare against our observed

values.

### *Maximum likelihood estimate of selection*

For the 7 known herbicide resistance alleles, we were particularly interested in individual estimates of selection on each allele over time. We used a maximum likelihood approach to estimate the strength of selection for each resistance allele between 1960-2018, along with a 95% credibility interval using profile likelihood. Summing over all years ( $t$ ), the log-likelihood of observing the data is given by the binomial sampling formula describing the chance of observing the number of resistance ( $n_R$ ) and susceptible alleles ( $n_S$ ) in any given year:

$$\ln(L) = \sum_t (n_R \cdot \log \frac{p^{st}}{(1-p) + p^{st}}) + (n_S \cdot \log \frac{p^{st}}{(1-p) + p^{st}})$$

where  $p$  represents the initial frequency of the allele when  $t = 0$  (defined as the present) and  $s$  represents the strength of selection, both of which are unknown and estimated by maximizing the likelihood. Because many of the resistant alleles were only observed in contemporary samples, selection must be sufficiently strong to explain this rise, but the maximum strength of selection cannot be determined (the likelihood surface becomes flat). We thus only present the 95% confidence interval in the text (i.e., those values of the  $s$  for which the  $\ln(L)$  falls within  $12[0.05]/2$  of the maximum likelihood). We implemented this algorithm in R, using the `mle2` function implemented within the `bbfme` package in R.

### *Ancestry inference*

For genome-wide ancestry inference, we merged filtered SNPs from herbarium samples with high-quality SNP sets from (11) ( $n=187$ , collections from 2018) and (31) ( $n=162$ , collections from 2015), resulting in 457 individuals and representing all resequenced *A. tuberculatus* whole genomes. We used `faststructure` (39) to infer individual-level ancestry, taking the proportion of an individual's assignment to a grouping at  $K=2$  to represent either var. *rudis* or var. *tuberculatus* ancestry. An individual's proportion of var. *rudis* ancestry was then analyzed in a multivariate regression that tested how well var. *rudis* ancestry was explained by longitude, latitude, environment (natural or agricultural), timespan (1800-1920 [ $n=39$ ], 1920-1980 [ $n=44$ ], 1920-2020 [ $n=374$ ]), a two-way timespan by longitude interaction, a two-way timespan by state interaction, and a three-way timespan by environment by longitude interaction:

```
Individual ancestry assignment ~ longitude + latitude + environment +  
timespan + timespan:longitude + timespan:state +  
timespan:environment:longitude
```

We also used `plink` to perform a principle component analysis of merged SNPs from just herbarium samples (**Fig S12**) and all 457 samples jointly (**Fig S13**).

We were interested in the distribution of var. *rudis* ancestry across the genome, and so used LAMP (40) to assign ancestry to SNPs, based on two reference populations homogenous for either var. *rudis* or var. *tuberculatus* ancestry (Kansas and Ontario Natural Populations, respectively; (31)). Ancestry informative SNPs were those with an  $F_{st} > 0.40$  (2x the mean genome-wide ancestry differentiation between varieties, in these two populations) between these reference populations and that were also in common between datasets (<20% of samples with missing data) after merging historical sequences with the contemporary paired sequence data (11). Since LAMP requires recombination rate information, we also imputed the LD-based genetic map from (31) to the ancestry-informative SNPs to get genetic distance between each. Finally, we performed the LAMP analysis, one population at a time, one scaffold at a time. After merging SNP-wise ancestry assignments across scaffolds, we calculated the mean, 5%, and 95% quantile of var. *rudis* ancestry in 100 kb regions for each population, and eventually, each environment (**Fig S10**).

To understand the relationship between ancestry, agricultural selection, and genomic architecture, we performed a multiple regression to quantify drivers of fine-scale ancestry across the genome. We regressed the individual proportion of var. *rudis* ancestry in 100 kb windows across the genome against gene density, recombination rate, scaffold, environment, average CMH score, average XPEHH (difference in extended haplotype homozygosity across environments), the interaction between environment and average CMH score in each window, and the interaction between environment and the mean XPEHH in each window.

```
100kb mean ancestry ~ scaffold + mean_genedensity + mean_recomb +  
mean_xpehh:env + mean_cmh:env + env
```

The least squares effect of environment on ancestry was taken to calculate the average difference in ancestry between agricultural and natural environments.

## Tables S1 to S5

**Table S1.** GO Enrichment results for the top 0.01% CMH outliers (n=2055 SNPs).

| <b>GO biological process complete</b> | <b>Expected alleles</b> | <b>Fold Enrichment</b> | <b>Bonferroni p-value</b> |
|---------------------------------------|-------------------------|------------------------|---------------------------|
| growth                                | 6.8                     | 3.1                    | 2.59E-02                  |
| anatomical structure morphogenesis    | 14.1                    | 2.3                    | 4.69E-02                  |
| anatomical structure development      | 44.1                    | 1.9                    | 1.67E-04                  |
| developmental process                 | 46.2                    | 1.8                    | 3.20E-04                  |
| response to hormone                   | 19.2                    | 2.3                    | 4.60E-03                  |
| response to organic substance         | 26.3                    | 2.0                    | 6.75E-03                  |
| response to chemical                  | 41.4                    | 1.8                    | 1.79E-03                  |
| response to stimulus                  | 85.3                    | 1.6                    | 3.30E-06                  |
| response to endogenous stimulus       | 19.6                    | 2.2                    | 3.38E-03                  |
| post-embryonic development            | 22.8                    | 2.1                    | 6.45E-03                  |
| multicellular organism development    | 38.2                    | 1.9                    | 7.02E-04                  |
| multicellular organismal process      | 42.5                    | 1.8                    | 6.59E-04                  |
| response to external stimulus         | 23.3                    | 2.1                    | 4.87E-03                  |
| system development                    | 29.2                    | 2.0                    | 1.10E-03                  |
| response to abiotic stimulus          | 32.8                    | 1.9                    | 1.14E-02                  |
| response to stress                    | 47.9                    | 1.7                    | 2.77E-02                  |
| cellular metabolic process            | 116.0                   | 1.5                    | 7.79E-07                  |
| metabolic process                     | 127.9                   | 1.5                    | 5.08E-06                  |
| cellular process                      | 182.1                   | 1.5                    | 5.85E-15                  |
| regulation of biological process      | 81.4                    | 1.5                    | 2.01E-02                  |
| biological regulation                 | 89.9                    | 1.5                    | 1.05E-02                  |
| organic substance metabolic process   | 119.0                   | 1.4                    | 4.05E-04                  |



**Table S2.** Gene and orthologue information for the 50 SNPs with the most significant CMH p-values, sorted by Scaffold and then CMH p-value. AMATA=*Amaranthus tuberculatus*, AT=*Arabidopsis thaliana*.

| Scaffold | Position | CMH p-value | AMATA gene | AT gene     | Orthologue                                                    | Blastn                          |
|----------|----------|-------------|------------|-------------|---------------------------------------------------------------|---------------------------------|
| 1        | 59264411 | 6.08E-10    | 2592       | NA          | NA                                                            | Nuclear Fusion Defective 4-like |
| 1        | 55158523 | 3.29E-09    | 2285       | At4g34215   | SGNH-hydrolase                                                |                                 |
| 1        | 54510509 | 8.91E-09    | 2244       | NA          | NA                                                            | NA                              |
| 1        | 12324718 | 1.93E-07    | 825        | AT5G09550.1 | Guanosine nucleotide diphosphate dissociation inhibitor (GDI) |                                 |
| 1        | 64789405 | 2.39E-07    | 3031       | AT4G38380.4 | Protein DETOXIFICATION 45%2C chloroplastic (DTX45)            |                                 |
| 10       | 15265237 | 7.25E-08    | 22183      | NA          | NA                                                            | NA                              |
| 10       | 26222541 | 1.03E-07    | 22540      | AT3G29385.1 | dentin sialophosphoprotein-like protein                       |                                 |
| 10       | 5374087  | 2.74E-07    | 21789      | NA          | NA                                                            | NA                              |
| 11       | 24079642 | 8.55E-11    | 25990      | AT5G63460.1 | LOWER TEMPERATURE 1                                           |                                 |
| 11       | 24078348 | 3.09E-10    | 25990      | AT5G63460.1 | LOWER TEMPERATURE 1                                           |                                 |
| 11       | 24086055 | 1.10E-09    | 25990      | AT5G63460.1 | LOWER TEMPERATURE 1                                           |                                 |
| 11       | 24006946 | 2.18E-09    | 25984      | AT5G14220.4 | <b>PPO2</b>                                                   |                                 |
| 11       | 24062979 | 2.36E-09    | 25989      | AT5G50380.1 | Exocyst complex component EXO70B1                             |                                 |
| 11       | 24080739 | 4.33E-09    | 25990      | AT5G63460.1 | LOWER TEMPERATURE 1                                           |                                 |
| 11       | 32783081 | 7.71E-09    | 26623      | NA          | NA                                                            |                                 |
| 11       | 24048769 | 1.30E-08    | 25988      | AT4G14110.1 | COP9 signalosome complex subunit 8 (CSN8)                     |                                 |
| 11       | 24047019 | 4.13E-08    | 25988      | AT4G14110.1 | COP9 signalosome complex subunit 8 (CSN8)                     |                                 |
| 11       | 24083434 | 4.40E-08    | 25990      | AT5G63460.1 | LOWER TEMPERATURE 1                                           |                                 |
| 11       | 24070607 | 4.79E-08    | 25989      | AT5G50380.1 | Exocyst complex component EXO70B1                             |                                 |
| 11       | 26024805 | 1.35E-07    | 26127      | AT1G75125.1 | plastid transcriptionally active protein                      |                                 |
| 11       | 25369807 | 1.47E-07    | 26088      | AT5G39610.1 | Nucleobase-ascorbate transporter 6 (NAC6)                     |                                 |
| 11       | 24021382 | 1.69E-07    | 25985      | AT5G16550.1 | LDAP INTERACTING PROTEIN                                      |                                 |
| 11       | 24024155 | 1.69E-07    | 25985      | AT5G16550.2 | LDAP INTERACTING PROTEIN                                      |                                 |
| 11       | 24048722 | 2.07E-07    | 25988      | AT4G14110.1 | CONSTITUTIVE PHOTOMORPHOGENIC 9                               |                                 |
| 11       | 24046969 | 2.55E-07    | 25988      | AT4G14110.1 | CONSTITUTIVE PHOTOMORPHOGENIC 9                               |                                 |
| 12       | 29335314 | 7.69E-10    | 24987      | ATMG00310.1 | ORF154                                                        |                                 |
| 12       | 29335422 | 3.09E-09    | 24987      | ATMG00310.1 | ORF154                                                        |                                 |
| 12       | 29327164 | 3.31E-09    | 24987      | ATMG00310.1 | ORF154                                                        |                                 |
| 12       | 29343299 | 1.81E-08    | 24987      | ATMG00310.1 | ORF154                                                        |                                 |
| 12       | 29336458 | 3.50E-08    | 24987      | ATMG00310.1 | ORF154                                                        |                                 |
| 12       | 29333763 | 5.83E-08    | 24987      | ATMG00310.1 | ORF154                                                        |                                 |
| 12       | 11427671 | 7.91E-08    | 24182      | NA          | NA                                                            | PPX2L                           |
| 12       | 29328119 | 1.21E-07    | 24987      | ATMG00310.1 | ORF154                                                        |                                 |
| 12       | 11429925 | 2.10E-07    | 24182      | NA          | NA                                                            | PPX2L                           |
| 12       | 29333575 | 2.30E-07    | 24987      | ATMG00310.1 | ORF154                                                        |                                 |
| 12       | 29333622 | 2.30E-07    | 24987      | ATMG00310.2 | ORF155                                                        |                                 |
| 13       | 35715956 | 8.71E-09    | 19321      | NA          | Calmodulin (Physarum polycephalum OX%253D5791)                |                                 |
| 13       | 38847060 | 6.31E-08    | 19605      | NA          | NA                                                            | WIP2-like protein               |
| 13       | 26858220 | 8.73E-08    | 18867      | NA          | NA                                                            | NA                              |
| 13       | 33084574 | 1.93E-07    | 19117      | AT4G14310.2 | KIN14B-interacting protein                                    |                                 |
| 13       | 41600578 | 2.63E-07    | 19862      | AT3G24160.1 | PUTATIVE TYPE 1 MEMBRANE PROTEIN                              |                                 |
| 2        | 53114550 | 8.86E-08    | 5599       | NA          | NA                                                            | NA                              |
| 2        | 10688517 | 9.38E-08    | 3997       | AT3G09630.1 | SUPPRESSOR OF ACAULIS 56 (SAC56)                              |                                 |
| 3        | 4797458  | 8.95E-09    | 6345       | NA          | NA                                                            | ATHB13                          |
| 3        | 1072396  | 9.09E-09    | 5998       | AT1G23820.1 | SPERMIDINE SYNTHASE 1                                         |                                 |
| 3        | 1072448  | 8.96E-08    | 5998       | AT1G23820.1 | SPERMIDINE SYNTHASE 1                                         |                                 |
| 3        | 16438213 | 1.27E-07    | 7059       | AT1G10150.1 | Carbohydrate-binding protein                                  |                                 |
| 3        | 5632229  | 1.80E-07    | 6414       | AT4G09650.1 | ATP SYNTHASE DELTA-SUBUNIT GENE (ATPD)                        |                                 |
| 6        | 18669007 | 1.54E-07    | 15047      | AT4G35830.1 | Aconitase 1 (ACO1)                                            |                                 |
| 8        | 15398786 | 1.13E-08    | 20978      | AT3G14310.1 | Pectin Methyltransferase 3                                    |                                 |

**Table S3.** Selection-migration differentiation statistics for 6 common resistance alleles, along with estimates of selection estimated by logistic regression of the allele frequency through time. Ag, agricultural sites; Nat, natural sites. Cost and benefit estimates shown here for the additive ( $h=0.5$ ) case.  $s$  (1960-2018) represents the maximum likelihood estimate of selection from the binomial sampling equation of allele frequency change, and we provide the associated 95% credible interval.

|                 | Ag Freq | Nat Freq | Ag Benefit (s./m.) | Nat Cost (s./m.) | Cost/Ben   | $s$ (1960-2018) | 95% CI of $s$ |
|-----------------|---------|----------|--------------------|------------------|------------|-----------------|---------------|
| <b>PPOdel</b>   | 0.66    | 0.056    | 2.53119            | 10.7446          | 4.24488087 | 1.16            | 0.097, 3      |
| <b>EPSPSamp</b> | 0.48    | 0.25     | 2.16346            | 2.88             | 1.33120095 | NA              | NA            |
| <b>EPSPS106</b> | 0.89    | 0.08     | 0.40858            | 0.4884           | 1.19535954 | 1.12            | 0.053, 3      |
| <b>ALS122</b>   | 0.034   | 0        | NA                 | NA               | NA         | -0.01           | -1, 3         |
| <b>ALS197</b>   | 0.011   | 0.015    | NA                 | NA               | NA         | 0.286           | -1, 3         |
| <b>ALS574</b>   | 0.65    | 0.22     | 1.14286            | 1.51515          | 1.32575294 | 0.09            | 0.044, 0.0167 |
| <b>ALS376</b>   | 0.921   | 0.0357   | 1.19023            | 2.51558          | 2.11352428 | 0.59            | 0.023, 3      |
| <b>ALS653</b>   | 0.9326  | 0.0612   | 0.196636           | 0.215061         | 1.09370105 | 0.55            | 0.029, 3      |

**Table S4.** The top 15 loci with the strongest evidence of temporal selection between 1970 and 2018.

| $s$   | $s$ p-value | AF<br>s(SE) change | scaf        | position | AMATA annotated gene    | AT orthologue                                                   | AT gene name |
|-------|-------------|--------------------|-------------|----------|-------------------------|-----------------------------------------------------------------|--------------|
| 0.106 | 4.680E-04   | 0.030 0.846        | Scaffold_11 | 26068182 | AMATA_chromosomes_26131 | NA                                                              | NA*          |
| 0.081 | 1.081E-04   | 0.021 0.823        | Scaffold_2  | 10755264 | AMATA_chromosomes_03999 | Subtilase family protein                                        | AT5G58840    |
| 0.057 | 2.382E-03   | 0.019 0.512        | Scaffold_10 | 22995135 | AMATA_chromosomes_22407 | phosphotyrosyl phosphatase activator (PTPA family protein)      | AT4G08960    |
| 0.052 | 8.211E-03   | 0.020 0.402        | Scaffold_11 | 26024805 | AMATA_chromosomes_26127 | plastid transcriptionally active protein                        | AT1G75125*   |
| 0.052 | 6.084E-05   | 0.013 0.646        | Scaffold_3  | 14213167 | AMATA_chromosomes_06976 | WRKY DNA-binding protein 13                                     | AT4G39410    |
| 0.047 | 2.549E-07   | 0.009 0.783        | Scaffold_10 | 36863790 | AMATA_chromosomes_23250 | hypothetical protein                                            | AT1G36320    |
| 0.046 | 1.272E-01   | 0.030 0.162        | Scaffold_3  | 49332690 | AMATA_chromosomes_08117 | NA                                                              | NA           |
| 0.045 | 2.889E-05   | 0.011 0.677        | Scaffold_6  | 18669007 | AMATA_chromosomes_15047 | ACO1                                                            | AT4G35830    |
| 0.043 | 8.557E-05   | 0.011 0.599        | Scaffold_12 | 21792253 | AMATA_chromosomes_24760 | NA                                                              | NA           |
| 0.043 | 4.601E-08   | 0.008 0.888        | Scaffold_3  | 5632229  | AMATA_chromosomes_06414 | ATPD (F-type H <sup>+</sup> -transporting ATPase subunit delta) | AT4G09650    |
| 0.036 | 8.069E-06   | 0.008 0.666        | Scaffold_12 | 5658420  | AMATA_chromosomes_23853 | NA                                                              | NA           |
| 0.033 | 4.729E-07   | 0.007 0.831        | Scaffold_10 | 20690917 | AMATA_chromosomes_22321 | CCB2 (chaperone DUF2930)                                        | AT5G52110    |
| 0.032 | 1.755E-07   | 0.006 0.819        | Scaffold_10 | 16005835 | AMATA_chromosomes_22202 | NA                                                              | NA           |
| 0.032 | 3.939E-05   | 0.008 0.708        | Scaffold_10 | 24312710 | AMATA_chromosomes_22452 | BPA4 (RNA-binding RRM/RBD/RNP motifs family protein, AT1G14340) | AT1G14340    |
| 0.031 | 5.175E-06   | 0.007 0.764        | Scaffold_2  | 17891465 | AMATA_chromosomes_04209 | NA                                                              | NA           |

\* ~2 Mb from PPO

**Table S5.** Metadata on herbarium collections.

| Sample | Herbarium | Year | State    | County/Locality                      | Description                                                                                            | Nat/Ag/Dist | Lat         | Long        | Catalog #   |
|--------|-----------|------|----------|--------------------------------------|--------------------------------------------------------------------------------------------------------|-------------|-------------|-------------|-------------|
| HBO900 | INHS      | 1876 | Illinois | Oquawka                              | Banks of the Mississippi                                                                               | Nat         | 40.900098   | -90.991298  | 1           |
| HBO901 | INHS      | 1870 | Illinois | Kankakee                             | Wet Banks                                                                                              | Nat         | 41.154318   | -87.919365  | 2           |
| HBO902 | INHS      | 1875 | Illinois | Oquawka                              | Banks of the Mississippi                                                                               | Nat         | 40.900098   | -90.991298  | 3           |
| HBO903 | INHS      | 1897 | Illinois | Warrenville                          | Mudflats                                                                                               | Nat         | 41.823199   | -88.174393  | 6           |
| HBO904 | INHS      | 1892 | Illinois | Chicago                              | Waste Ground<br>("Exposition Building")                                                                | Dist        | 41.779452   | -87.61641   | 7 (429)     |
| HBO907 | INHS      | 1897 | Illinois | Chicago                              | Dumping ground, Brighton<br>Park                                                                       | Dist        | 41.818787   | -87.706608  | 10          |
| HBO908 | INHS      | 1952 | Illinois | Fithian, Vermilion<br>County         | Along railroad                                                                                         | Dist        | 40.114645   | -87.875056  | 11 (56279)  |
| HBO909 | INHS      | 1946 | Illinois | Gardenplain, Whiteside<br>County     | Peat soil in potato field,<br>"L.C. Anderson Farm"                                                     | Ag          | 41.782572   | -90.138152  | 12 (19934)  |
| HBO910 | INHS      | 1948 | Illinois | W of Antioch, Lake<br>County         | Disturbed soil                                                                                         | Dist        | 42.481444   | -88.157622  | 13 (32479)  |
| HBO911 | INHS      | 1947 | Illinois | W of Gillespie,<br>Macoupin County   | Corn field                                                                                             | Ag          | 39.127901   | -89.860508  | 14 (22536)  |
| HBO912 | INHS      | 2005 | Illinois | Minooka Rd & Route I-<br>80, Minooka | Disturbed moist cropland<br>margin near sable creek                                                    | Ag          | 41.457917   | -88.308444  | 15 (242814) |
| HBO913 | INHS      | 2000 | Illinois | Cooperstown, Brown<br>County         | Former marsh in partly<br>filled obow, mostly used as<br>corn fields                                   | Ag          | 39.959059   | -90.611708  | 16 (205271) |
| HBO914 | MBDH      | 1895 | Ohio     | Fulton Co.                           | Cornfield along the new<br>river improvement on the<br>prairie                                         | Ag          | 41.67333333 | 84.32694444 | 357         |
| HBO915 | MBDH      | 1903 | Ontario  | Essex Co.                            | NA                                                                                                     | NA          | 41.772246   | -82.79184   | 265         |
| HBO916 | MBDH      | 1955 | Ohio     | Greene Co.                           | Front lawn of Campus<br>house                                                                          | Dist        | 39.82083333 | 84.01944444 | 292         |
| HBO917 | MBDH      | 1956 | Ohio     | Mercer Co.                           | Roadside, edge of soybean<br>field                                                                     | Ag          | 40.67861111 | 84.51861111 | 197         |
| HBO918 | MBDH      | 1991 | Ohio     | Putnam Co.                           | Weedy ground alongside<br>Blanchard river                                                              | Nat         | 41.03944444 | 84.15694444 | 253         |
| HBO919 | IUH       | 1898 | Indiana  | Lake                                 | on ballast (railroad bed)                                                                              | Dist        | 41.602259   | -87.25837   | IND-0088703 |
| HBO920 | IUH       | 1941 | Indiana  | Vanderburgh                          | cultivated ground                                                                                      | Ag          | 37.870283   | -87.634147  | IND-0088729 |
| HBO921 | IUH       | 1941 | Indiana  | Vanderburgh                          | field north of river slough                                                                            | Ag          | 37.979365   | -87.544518  | IND-0088730 |
| HBO922 | IUH       | 1952 | Indiana  | Johnson                              | Low cornfield                                                                                          | Ag          | 39.482726   | -86.019624  | IND-0088699 |
| HBO923 | IUH       | 2007 | Indiana  | Vigo                                 | Mesic loam plain fallow<br>cropland with successional<br>weeds                                         | Ag          | 39.43257    | -87.380135  | IND-0088738 |
| HBO924 | KUMH      | 1897 | Missouri | Jackson, Courtney                    | Common along river                                                                                     | Nat         | 39.15556    | -94.39333   | 176647      |
| HBO925 | KUMH      | 1913 | Kansas   | Doniphan,                            | Mesophytic oat field.                                                                                  | Ag          | 39.813187   | -95.160615  | 43812       |
| HBO926 | KUMH      | 1913 | Kansas   | Doniphan,                            | Mesophytic oat field.                                                                                  | Ag          | 39.813187   | -95.160615  | 43965       |
| HBO927 | KUMH      | 1949 | Kansas   | Shawnee, Lake<br>Shawnee             | Dry grassland.                                                                                         | Nat         | 39.000784   | -95.626093  | 43811       |
| HBO928 | KUMH      | 1940 | Kansas   | Douglas, Lawrence                    | Field.                                                                                                 | Ag          | 38.9365     | -95.22391   | 44000       |
| HBO929 | KUMH      | 1970 | Kansas   | Chautauqua, Peru                     | Low, cultivated field.<br>Gumbo soil.                                                                  | Ag          | 37.09524    | -96.07752   | 43956       |
| HBO930 | KUMH      | 1973 | Kansas   | Allen, Elsmore                       | Roadside right of way<br>along field. Weedy, good<br>soil.                                             | Ag          | 37.79382    | -95.16832   | 43987       |
| HBO931 | KUMH      | 1981 | Kansas   | Doniphan, Denton                     | Edge of cultivated field.                                                                              | Ag          | 39.70289    | -95.30739   | 43933       |
| HBO932 | KUMH      | 1994 | Kansas   | Labette, Parsons                     | Disturbed roadside along<br>bean field and adjacent<br>woodlands to the S.<br>(scattered pop in field) | Ag          | 37.29416    | -95.210223  | 111589      |
| HBO933 | ROM       | 1891 | Ontario  | NA                                   | Leading to the H null<br>Cemetery                                                                      | Dist        | 43.892294   | -81.312444  | 447         |
| HBO934 | ROM       | 1889 | Ontario  | Wingham                              | Alluvial soil (wet soil)                                                                               | Nat         | 43.89161    | -81.312795  | 189975      |
| HBO935 | ROM       | 1880 | Ontario  | London                               | Fields                                                                                                 | Ag          | 42.954827   | -81.234897  | 188334      |
| HBO936 | ROM       | 1891 | Ontario  | Leasselman                           | Alluvium along the Nation<br>River                                                                     | Nat         | 45.319337   | -75.093578  | 438         |
| HBO937 | ROM       | 1880 | Ontario  | North Branch, London                 | Low River Flats                                                                                        | Nat         | 43.04267    | -81.175264  | 441         |

|        |     |      |          |                                                                        |                                                                              |      |           |            |             |
|--------|-----|------|----------|------------------------------------------------------------------------|------------------------------------------------------------------------------|------|-----------|------------|-------------|
| HBO938 | ROM | 1940 | Ontario  | New Durham, Brant Co                                                   | Edge of Field                                                                | Ag   | 43.04956  | -80.523938 | 129548      |
| HBO939 | ROM | 1960 | Ontario  | Dunnville, Haldimand Co                                                | Wasteground by Lake Erie                                                     | Dist | 42.86879  | -79.617923 | 159479      |
| HBO940 | ROM | 1950 | Ontario  | Kent Co                                                                | Wet sand at Rankin creek near Mitchell Bay                                   | Nat  | 42.48877  | -82.413605 | 80.118      |
| HBO941 | ROM | 1960 | Ontario  | Grenville Co, ON                                                       | Muddy shore of South Nation River                                            | Nat  | 44.828922 | -75.554629 | 134207      |
| HBO942 | ROM | 1986 | Ontario  | Walpole Island                                                         | Disturbed forest/tall grass prairie - swampy                                 | Nat  | 42.568369 | -82.504545 | TRT00029148 |
| HBO943 | ROM | 1991 | Ontario  | Louth Twp., Niagara RM                                                 | W Shoreline of Jordan Marsh                                                  | Nat  | 43.174444 | -79.375015 | 246184      |
| HBO944 | ROM | 1985 | Ontario  | Ottawa-Carleton                                                        | Silty wet sand in dried-up pond in old pasture                               | Dist | 45.274525 | -76.088545 | 234833      |
| HBO945 | ROM | 1988 | Ontario  | Wasaga Beach                                                           | Nottawasaga R. at Jack L.                                                    | Nat  | 44.485637 | -79.99545  | 240977      |
| HBO947 | ROM | 1997 | Ontario  | Brighton Tw., Northumberland Co                                        | Sand pile, N shore of Lake Ontario                                           | Nat  | 43.997787 | -77.729332 | 256250      |
| HBO948 | ROM | 1990 | Ontario  | Wingham                                                                | Riverbanks                                                                   | Nat  | 43.89161  | -81.312795 | 27813       |
| HBO949 | ROM | 1880 | Ontario  | N.B. London                                                            | River flat                                                                   | Nat  | 43.083152 | -81.166767 | 85.246      |
| HBO950 | UMH | 2001 | Michigan | Lenawee Co                                                             | Open roadside at edge of cornfield, S side of Lime Creek Rd, w of Rogers Hwy | Ag   | 41.766065 | -84.227971 | 1209687     |
| HBO951 | UMH | 1909 | Michigan | near Port Huron                                                        | Invading cultivated fields as a weed, abundant                               | Ag   | 42.979577 | -82.470627 | 1209704     |
| HBO952 | UMH | 1897 | Illinois | Warrenville                                                            | Mud flats                                                                    | Nat  | 41.829751 | -88.177826 | 1559076     |
| HBO953 | UMH | 1883 | Ohio     | Cincinnati                                                             | NA                                                                           | NA   | 39.136053 | -84.502294 | 1207957     |
| HBO954 | UMH | 1833 | Ohio     | North Bend, Cincinnati                                                 | Sandy beach of Ohio River                                                    | Nat  | 39.14757  | -84.753428 | 1207929     |
| HBO955 | UMH | 1932 | Ontario  | Little Current, Manitoulin Island                                      | In open fields                                                               | Ag   | 45.966667 | -81.933333 | 1208039     |
| HBO956 | UMH | 1986 | Ontario  | Essex Co, Malden Twp                                                   | Big creek marsh                                                              | Nat  | 42.05088  | -83.056715 | 1208029     |
| HBO957 | UMH | 1946 | Illinois | Sangamon Co                                                            | Woods                                                                        | Nat  | 39.578464 | -89.730027 | 1208025     |
| HBO958 | UMH | 1989 | Ontario  | N Plantagent Ip, Jessup's Falls (South Nation PP), Hwy 17 @ S Nation R | Rockshore protection and waste ground along river                            | Dist | 45.559302 | -75.064719 | 1207959     |
| HBO959 | UMH | 1882 | Illinois | Riverside                                                              | Gravelly, dry bed of Des Plaines River                                       | Nat  | 41.826723 | -87.82569  | 1559075     |
| HBO961 | UMH | 1949 | Illinois | Champaign Co                                                           | Mud and sand at bottom of a ditch                                            | Dist | 40.061911 | -88.105443 | 1559082     |
| HBO962 | UMH | 1993 | Ontario  | Middlesex Co, Lobo Twp,                                                | Komoka Creek Swamp near Thames River, Edge of Thames                         | Nat  | 42.917996 | -81.441417 | 1207956     |
| HBO963 | UMH | 1995 | Ontario  | Niagara Regional Municipality, Niagara Falls Twp                       | Moist disturbed ground near railway tracks                                   | Dist | 43.06736  | -79.084574 | 1208030     |
| HBO964 | MOB | 1877 | Illinois | Saint Clair                                                            | Low places                                                                   | Nat  | 38.55     | -89.916667 | 1740835     |
| HBO965 | MOB | 1889 | Missouri | St. Louis City                                                         | NA                                                                           | NA   | 38.62975  | -90.242434 | 1740859     |
| HBO966 | MOB | 1893 | Illinois | Saint Clair                                                            | Low places                                                                   | Nat  | 38.509011 | -90.177817 | 1740847     |
| HBO967 | MOB | 1897 | Illinois | Warrenville                                                            | Mudflats *note: same pop/date/collector as #93                               | Nat  | 41.829751 | -88.177826 | 38973       |
| HBO968 | MOB | 1902 | Illinois | Saint Clair                                                            | Wet plains in East St Louis                                                  | Nat  | 38.625    | -90.16     | 1740833     |
| HBO969 | MOB | 1912 | Missouri | St. Louis City                                                         | In open field                                                                | Ag   | 38.603097 | -90.257021 | 778075      |
| HBO960 | MOB | 1919 | Illinois | Pope                                                                   | Muddy banks of Ohio River                                                    | Nat  | 37.364829 | -88.482798 | 853159      |
| HBO970 | MOB | 1925 | Illinois | Lake                                                                   | Wet open ground, borders of tamarack swamp                                   | Nat  | 42.370872 | -88.121862 | 940825      |
| HBO971 | MOB | 1927 | Missouri | St. Louis                                                              | Mo River Sand Bar                                                            | Nat  | 38.595548 | -90.767735 | 2157288     |
| HBO972 | MOB | 1927 | Illinois | St. Clair                                                              | In moist ground near Sugar Loaf Station, about 2 miles south of Du Po        | Dist | 38.495758 | -90.217877 | 1026850     |
| HBO973 | MOB | 1930 | Missouri | St. Louis                                                              | Sandy fields                                                                 | Ag   | 38.715451 | -90.48898  | 2157285     |
| HBO974 | MOB | 1933 | Missouri | St. Louis                                                              | Alluvial banks along mississippi river, 6500 South St. Louis                 | Nat  | 38.572701 | -90.229642 | 1140474     |
| HBO975 | MOB | 1940 | Illinois | Champaign                                                              | Moist thicket along sangamon River, 15 miles west of Urbana                  | Nat  | 40.119754 | -88.498602 | 1579795     |

|        |      |      |          |                     |                                                                                                   |      |           |            |            |
|--------|------|------|----------|---------------------|---------------------------------------------------------------------------------------------------|------|-----------|------------|------------|
| HBO976 | MOB  | 1962 | Illinois | Tazwell             | Low River Bank                                                                                    | Nat  | 40.720818 | -89.597212 | 1812554    |
|        |      |      |          |                     | Bottom of Maumee River at SW corner of Maumee city Limits                                         |      |           |            | 6773122    |
| HBO977 | MOB  | 1967 | Ohio     | Lucas               |                                                                                                   | Nat  | 41.542549 | -83.689433 |            |
|        |      |      |          |                     | Weedy mowed and cultivated fields and bulldozed areas                                             | Ag   | 38.779167 | -89.640556 | 6113965    |
| HBO978 | MOB  | 2005 | Illinois | Madison             |                                                                                                   |      |           |            | 6449615    |
|        |      |      |          |                     | Howell Island Conservation area, huge population, in large field next to hiking trail             | Nat  | 38.665567 | -90.70705  |            |
| HBO979 | MOB  | 2009 | Missouri | St. Charles         |                                                                                                   |      |           |            | 6443667    |
|        |      |      |          |                     | Dallas city public fishing access on the bank of the Mississippi River, and nearby railway tracks | Nat  | 40.634567 | -91.179467 |            |
| HBO980 | MOB  | 2009 | Illinois | Hancock             |                                                                                                   |      |           |            |            |
| HBO981 | MOB  | 2010 | Missouri | Montgomery          | Loutre River                                                                                      | Nat  | 38.911389 | -91.592778 | 6334467    |
|        |      |      |          |                     | Roadside through floodplain with deep alluvial sandy loam                                         | Dist | 37.923333 | -89.893333 | 6341594    |
| HBO982 | MOB  | 2011 | Illinois | Randolph            |                                                                                                   |      |           |            | 6773126    |
|        |      |      |          |                     | A common weed in low and cultivated ground                                                        | Ag   | 37.204167 | -94.344167 |            |
| HBO983 | MOB  | 1919 | Missouri | Jasper              |                                                                                                   |      |           |            |            |
| HBO984 | AAFC | 1892 | Ontario  | Ottawa              | NA                                                                                                | NA   | 45.289379 | -75.737232 | 1001151662 |
|        |      |      |          |                     | 3 miles East, Wet Roadside                                                                        | Dist | 45.19477  | -75.78076  | 1151663    |
| HBO985 | AAFC | 1955 | Ontario  | Richmond, Carleton  |                                                                                                   |      |           |            |            |
|        |      |      |          |                     | Shoreline of Ottawa River, moist sandy gravelly soil                                              | Nat  | 45.457179 | -75.676253 | 1151664    |
| HBO986 | AAFC | 1954 | Ontario  | Rockcliffe Park     |                                                                                                   |      |           |            |            |
| HBO987 | AAFC | 1921 | Ontario  | Ottawa              | Lac Constane                                                                                      | Nat  | 47.387012 | -77.283366 | 1151665    |
|        |      |      |          |                     | 1 mile N of York, Sand beach                                                                      | Nat  | 43.035303 | -79.897787 | 1151667    |
| HBO988 | AAFC | 1951 | Ontario  | Haldimand County    |                                                                                                   |      |           |            |            |
|        |      |      |          |                     | East beach, moist sand beach                                                                      | Nat  | 41.93464  | -82.505179 | 1151668    |
| HBO989 | AAFC | 1988 | Ontario  | Essex County        |                                                                                                   |      |           |            |            |
|        |      |      |          |                     | North shore or W End, Moist woods                                                                 | Nat  | 41.683999 | -82.682764 | 1151669    |
| HBO990 | AAFC | 1998 | Ontario  | Essex County        |                                                                                                   |      |           |            |            |
|        |      |      |          |                     | Dried bed of the Raisin River at rapids                                                           | Nat  | 45.13414  | -74.575361 | 1151671    |
| HBO991 | AAFC | 1964 | Ontario  | Glengarry County    |                                                                                                   |      |           |            |            |
|        |      |      |          |                     | Along sandy beach, Between Mississippi River & McEwan Nay.                                        | Nat  | 45.046655 | -76.230997 | 1151672    |
| HBO992 | AAFC | 1949 | Ontario  | Lanark              |                                                                                                   |      |           |            |            |
|        |      |      |          |                     | High grass along tracks, Railyards north of the station                                           | Dist | 42.957915 | -82.393943 | 1151673    |
| HBO993 | AAFC | 1960 | Ontario  | Sarnia              |                                                                                                   |      |           |            |            |
| HBO994 | AAFC | 1937 | Ontario  | Ottawa              | Shore line, Moira Lake                                                                            | Nat  | 44.486839 | -77.458612 | 1151674    |
|        |      |      |          |                     | Muddy inundated shore of South Nation River                                                       | Nat  | 44.951292 | -75.483802 | 1151675    |
| HBO995 | AAFC | 1960 | Ontario  | Grenville County    |                                                                                                   |      |           |            |            |
|        |      |      |          |                     | Rocky Point Prov. Park, Dunville Twp.                                                             | Nat  | 42.847407 | -79.555433 | 1154001    |
| HBO997 | AAFC | 1988 | Ontario  | Hald-Norfolk County |                                                                                                   |      |           |            |            |
|        |      |      |          |                     | Railway tracks                                                                                    | Dist | 44.988422 | -74.996022 | 1151676    |
| HBO998 | AAFC | 1958 | Ontario  | Stormont County     |                                                                                                   |      |           |            |            |
| HBO999 | AAFC | 1938 | Ontario  | Pelee Island        | NA                                                                                                | Nat  | 41.683999 | -82.682764 | 1154003    |
| HB1000 | AAFC | 1934 | Ontario  | Mitchell's Bay      | Waste places                                                                                      | Dist | 42.468738 | -82.407807 | 1154004    |
|        |      |      |          |                     | Edge of 1st Island below Gault                                                                    | Nat  | 43.352835 | -80.316045 | 1154005    |
| HB1001 | AAFC | 1939 | Ontario  | Waterloo County     |                                                                                                   |      |           |            |            |
| HB1002 | AAFC | 1918 | Ontario  | NA                  | NA                                                                                                | NA   | 42.77177  | -81.197887 | 1154008    |
|        |      |      |          |                     | Wet Field beside Speed River                                                                      | Ag   | 43.455939 | -80.290772 | 1154009    |
| HB1003 | AAFC | 1961 | Ontario  | Waterloo County     |                                                                                                   |      |           |            |            |
| HB1004 | AAFC | 1828 | Ontario  | Middlesex County    | Thames River                                                                                      | Nat  | 42.959472 | -81.309866 | 1154010    |
| HB1005 | AAFC | 1828 | Ontario  | Middlesex County    | Bank of the Thames                                                                                | Nat  | 42.980389 | -81.344198 | 1154011    |
|        |      |      |          |                     | Wet Field beside Speed River                                                                      | Ag   | 43.455939 | -80.290772 | 1154012    |
| HB1006 | AAFC | 1961 | Ontario  | Waterloo County     |                                                                                                   |      |           |            |            |
|        |      |      |          |                     | Muddy soil along side creek                                                                       | Nat  | 43.030996 | -81.349254 | 1154014    |
| HB1007 | AAFC | 1966 | Ontario  | Middlesex County    |                                                                                                   |      |           |            |            |
| HB1008 | AAFC | 1828 | Ontario  | Middlesex County    | NA                                                                                                | NA   | 42.950068 | -81.435938 | 1154013    |
|        |      |      |          |                     | In boggy soil                                                                                     | Nat  | 43.892294 | -81.312444 | 1151660    |
| HB1009 | AAFC | 1903 | Ontario  | NA                  |                                                                                                   |      |           |            |            |
| HB1010 | INHS | 1906 | Illinois | Riverdale           | Along railroad                                                                                    | Dist | 41.640523 | -87.626446 | 8 (2632)   |
| HB1011 | INHS | 1894 | Illinois | Wheaton             | Roadside                                                                                          | Dist | 41.864251 | -88.103346 | 9 (267)    |

## Figures S1 to S13

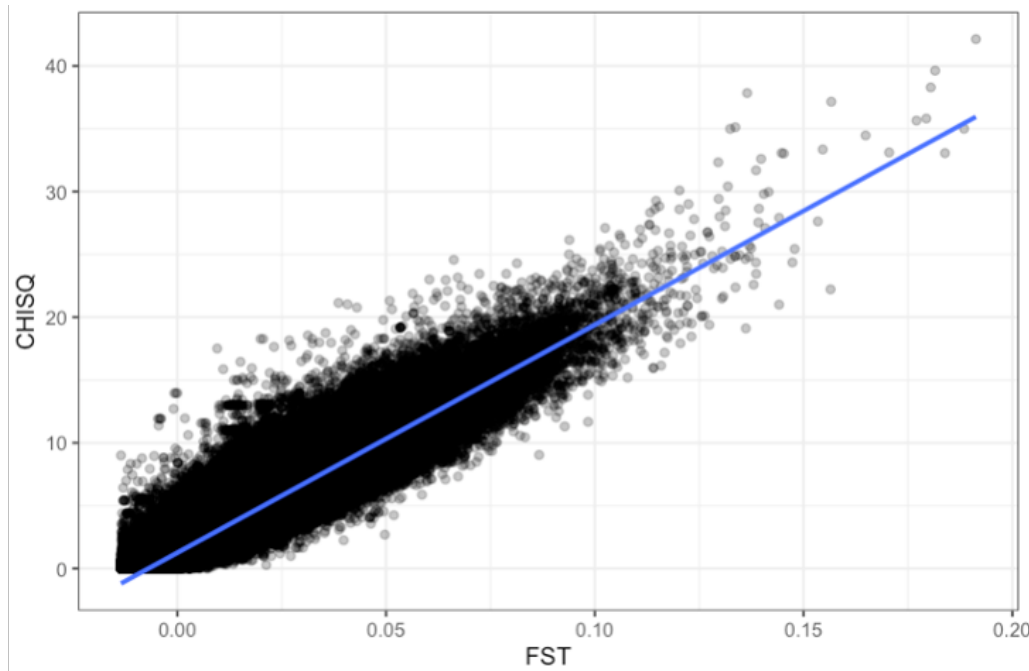

**Fig S1.** CMH  $X^2$  statistic against between-environment  $F_{ST}$ , with the latter not stratifying for population pair.

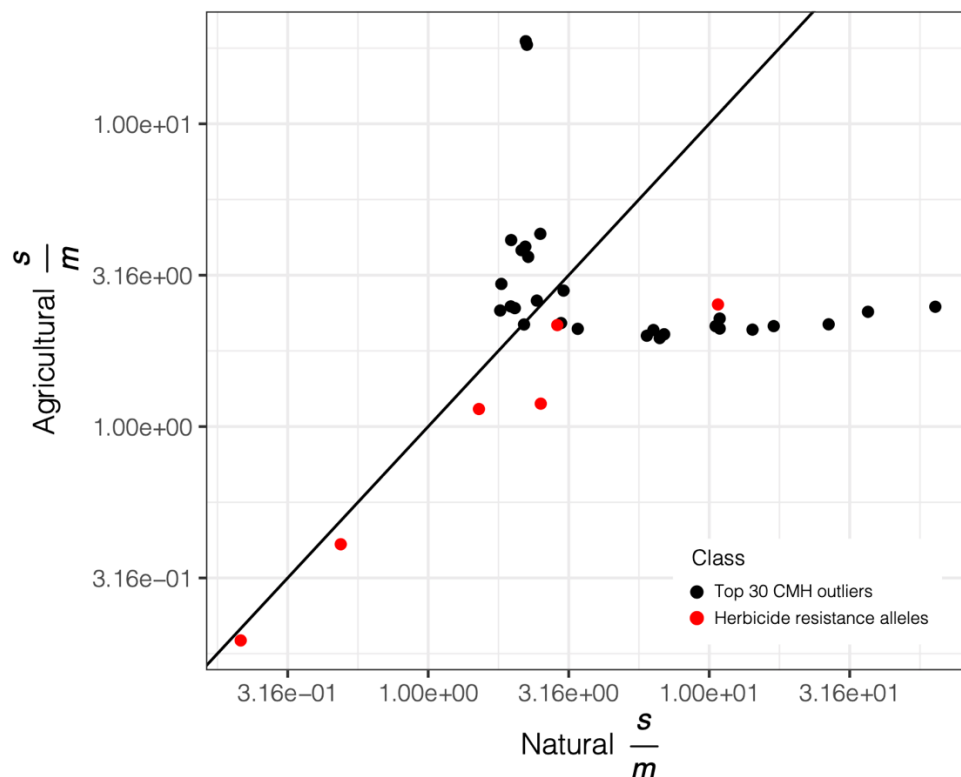

**Fig S2.** Agricultural  $\frac{s}{m}$  versus natural  $\frac{s}{m}$  for the 30 independent loci with the most significant CMH scan hits compared to 6 common herbicide resistance alleles. Diagonal line represents equal agricultural benefits compared to natural costs, scaled by migration.

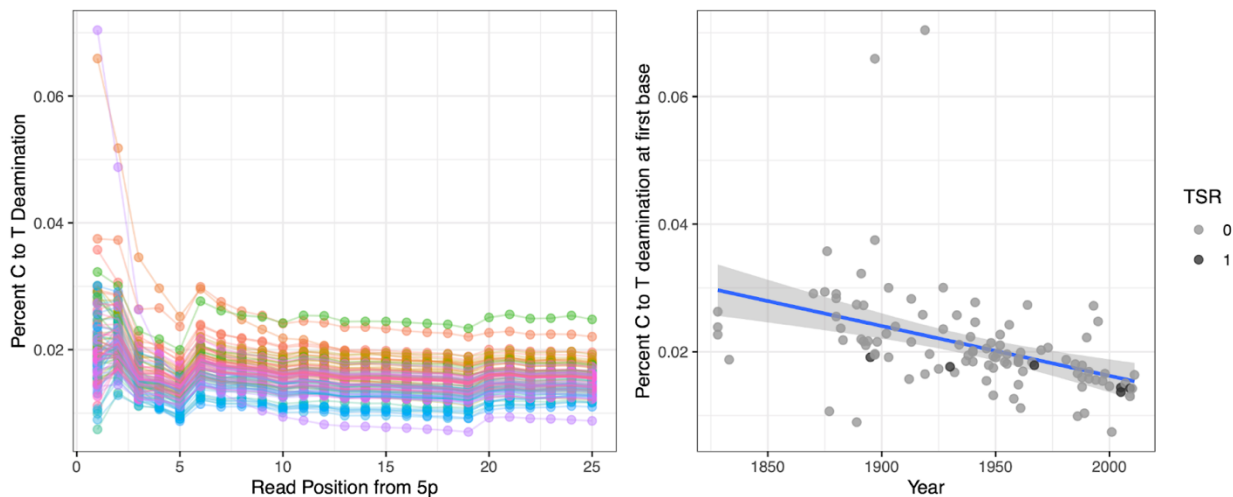

**Fig S3.** Percent C-to-T substitution at first base, and its correlation with read position and collection year for 108 sequenced herbarium samples. Right figure additionally illustrates C-to-T substitution level for the six samples with known target-site resistance alleles (three TSR genotypes excluded from selection analyses due to allelic bias).

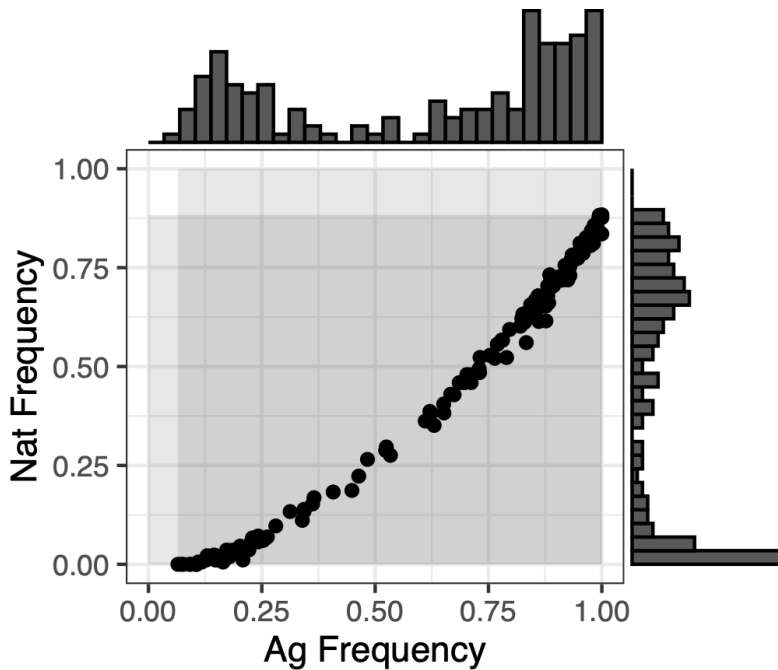

**Fig S4.** The distribution of frequencies for agriculturally adaptive alleles in agricultural samples along the x-axis, and in natural samples along the y-axis. Null distributions for an expectation of change in the frequency in our focal set of contemporary alleles was generated by producing randomized allele sets of the same size ( $n=154$ ) matching the extant agricultural-allele frequency distributions shown here, first in natural environments (top histogram), and then in agricultural environments (right histogram).



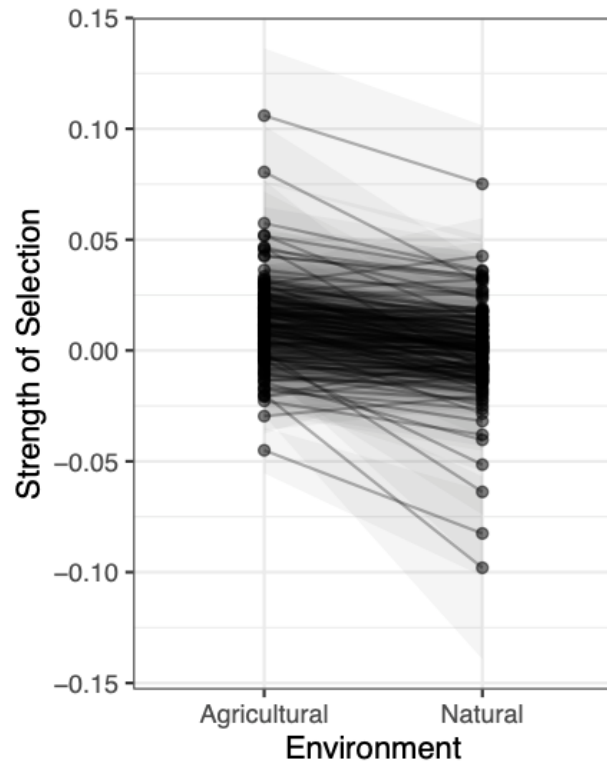

**Fig S5.** Inferred strength of selection on 154 agricultural alleles through time, in either agricultural or natural environments. Selection coefficients were extracted from logit-transformed logistic regressions of genotype on year, run separately for each locus in each environment. Gray ribbon for each locus represents the bounds of the standard error associated with the estimate of selection in each environment.

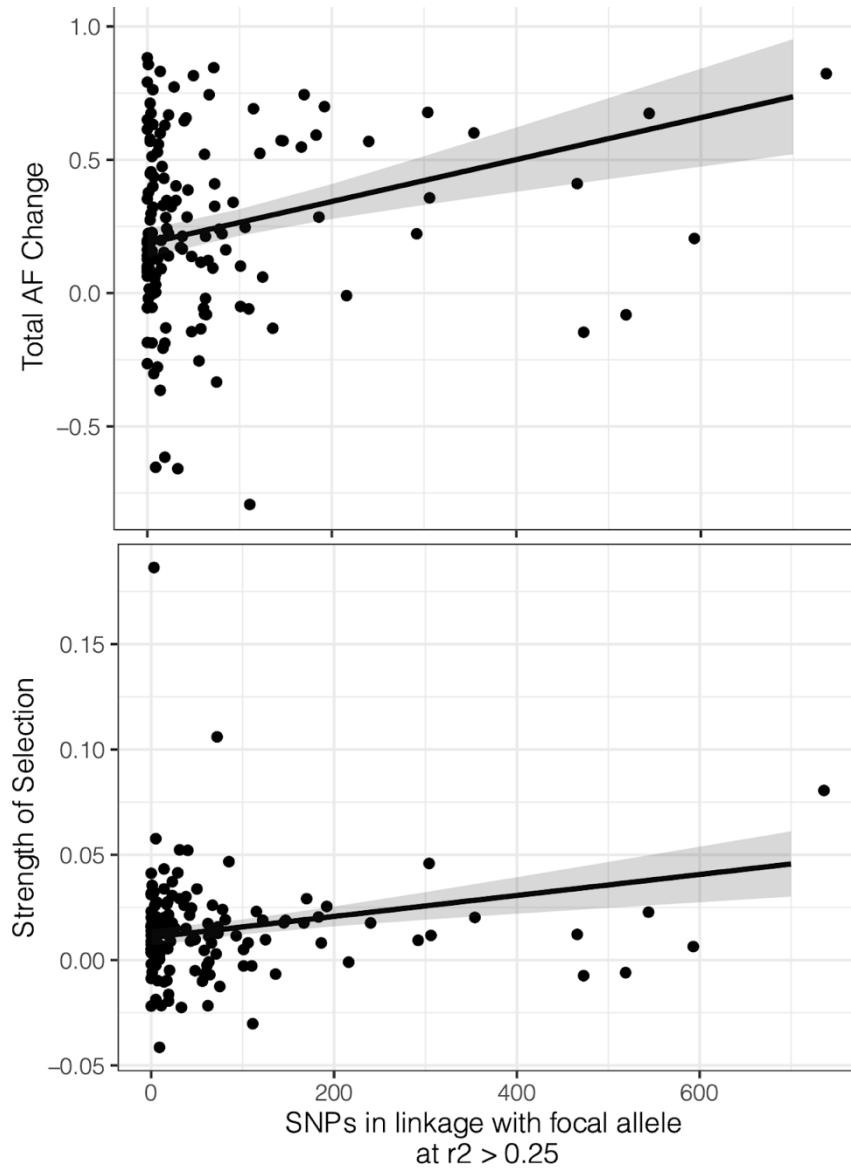

**Fig S6.** The association between contemporary patterns of linkage and selection and allele frequency change observed over the last 150 years across herbarium samples. Regression line shows the least square mean effect of contemporary linkage from a multiple regression analysis.

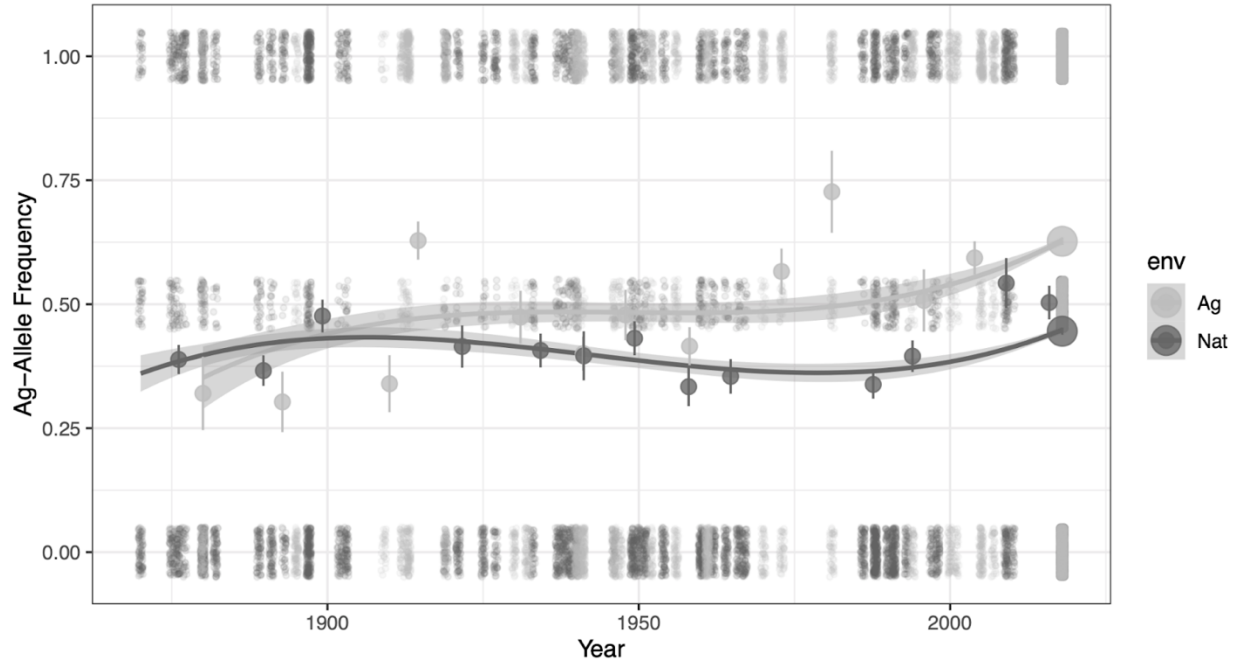

**Fig S7.** Cubic splines that illustrate the environment-specific frequency change of agricultural alleles through time since 1870. Gray ribbon denotes the 95% CI.

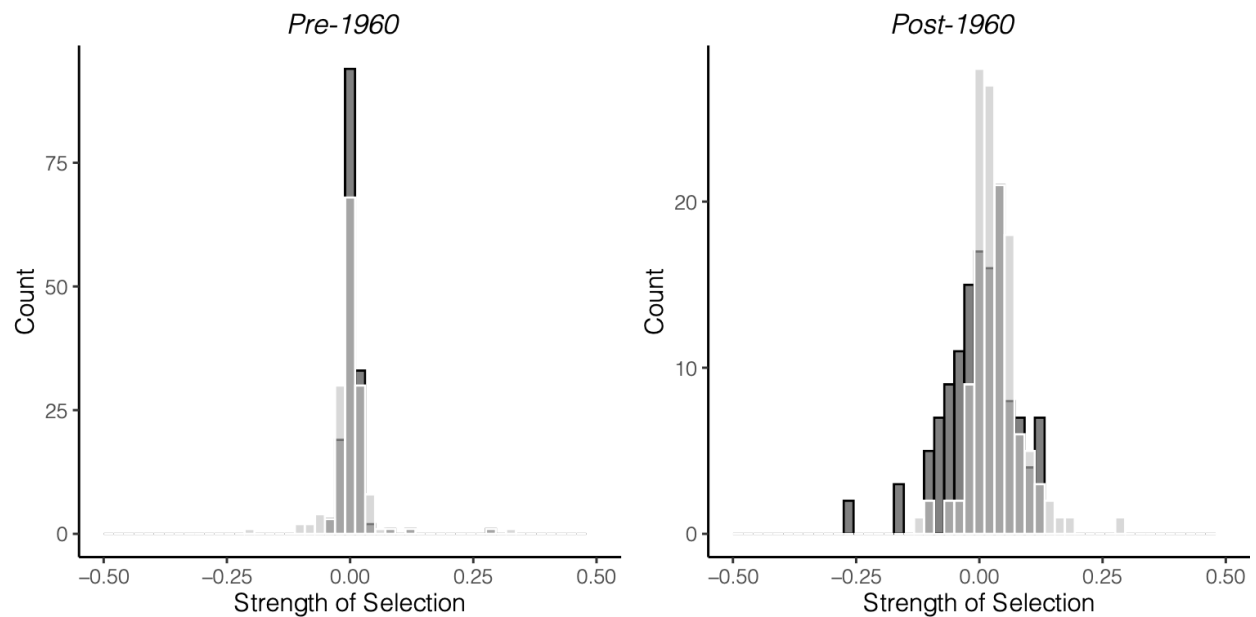

**Fig S8.** Logistic estimates of selection before (left) and after (right) the 1960s, the start of agricultural intensification, for agriculturally-associated alleles in natural (dark gray) versus agricultural and disturbed (light gray) environments.

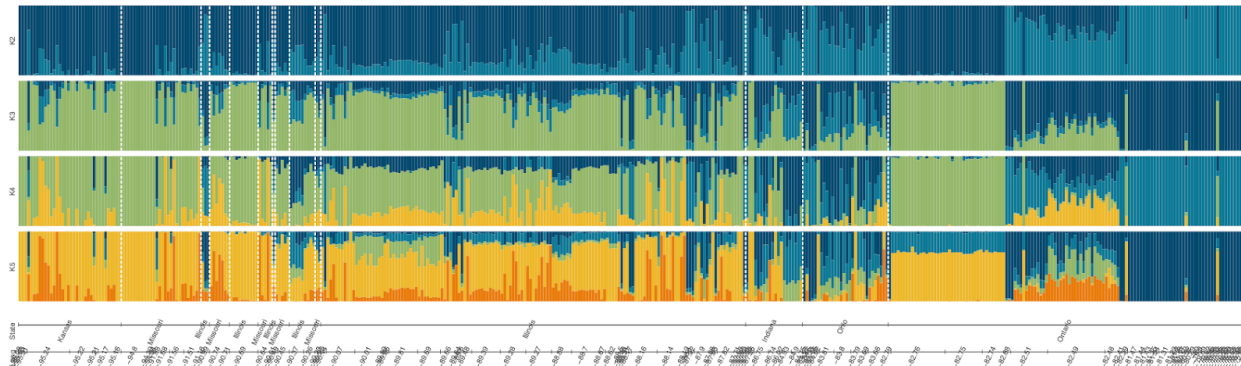

**Fig S9.** Longitudinal and state-wise patterns of ancestry across 457 *A. tuberculosis* individuals from contemporary and historical sampling, inferred from faststructure. Samples sorted by longitude, from west (left) to east (right). White dashed lines denote clusters of specimens sampled from different states and provinces across this longitudinal gradient. K=2 taken as var. *rudis* versus var. *tuberculatus* ancestry, as in (31).

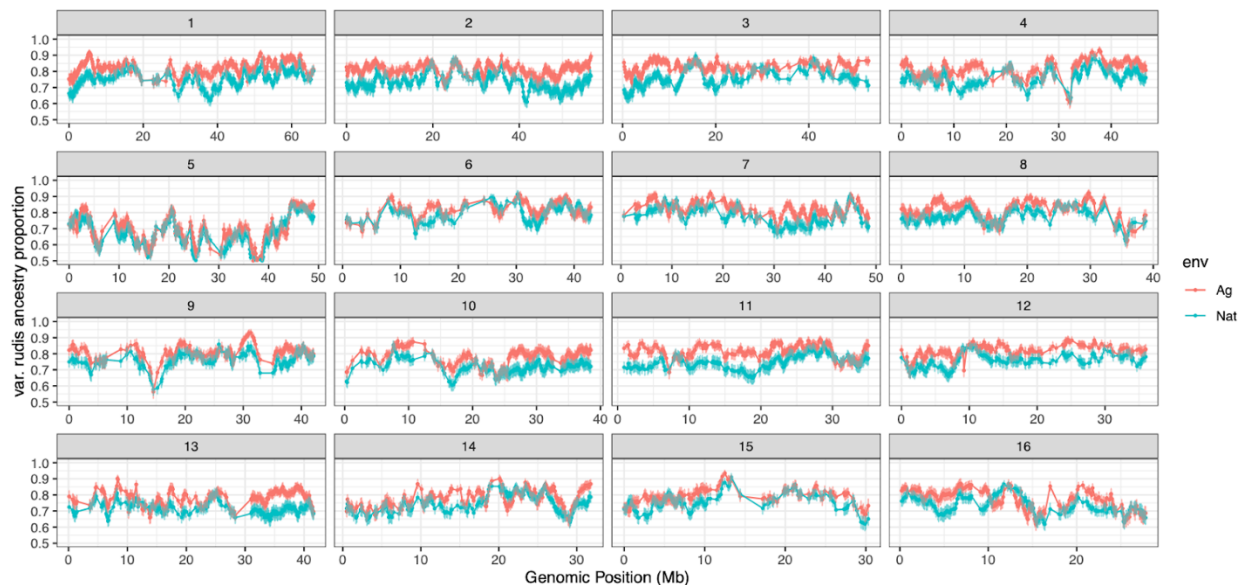

**Fig S10.** Excess of var. *rudis* ancestry in agricultural compared to natural environments, in 100 kb regions across the genome. Lines depict the mean ancestry across all populations within each environment, with error bars showing the mean 5th and 95th percentile of ancestry across populations. Fine-scale ancestry estimates were inferred with LAMP (40).

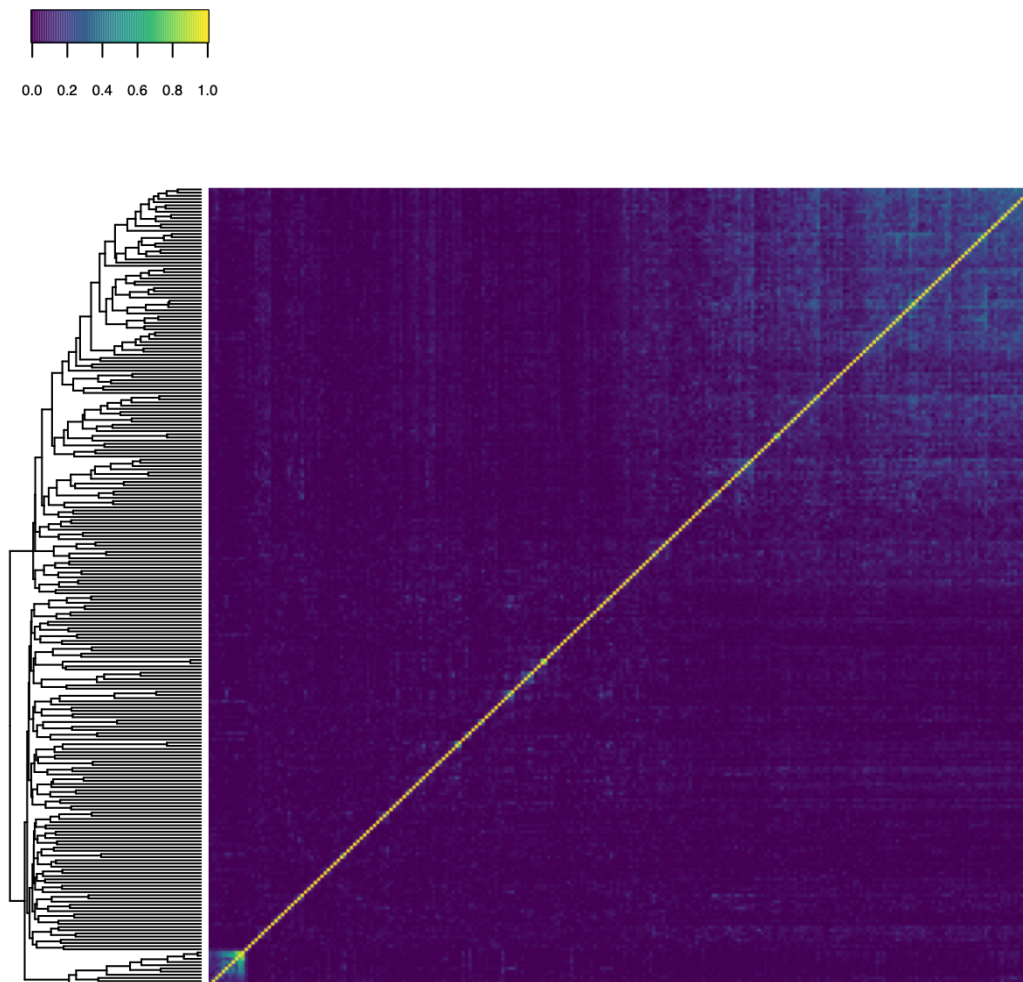

**Fig S11.** Heatmap of  $r^2$  values alongside a dendrogram of the 254 agriculturally associated SNPs identified through CMH tests across paired contemporary natural-agricultural samples, illustrating independence among the 154 LD-clumped CMH outliers.

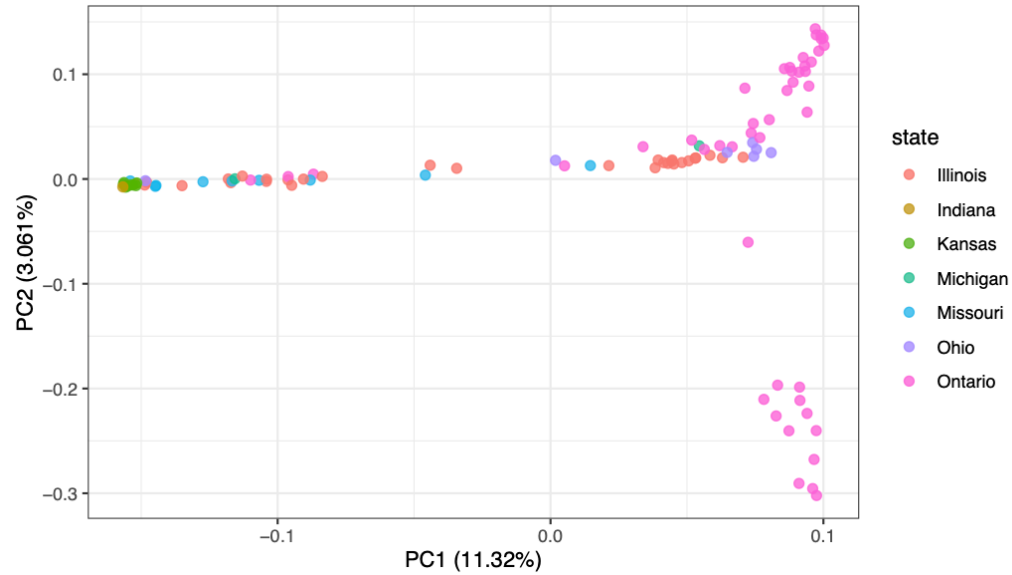

**Fig S12.** PCA of herbarium samples, coloured by state/province.

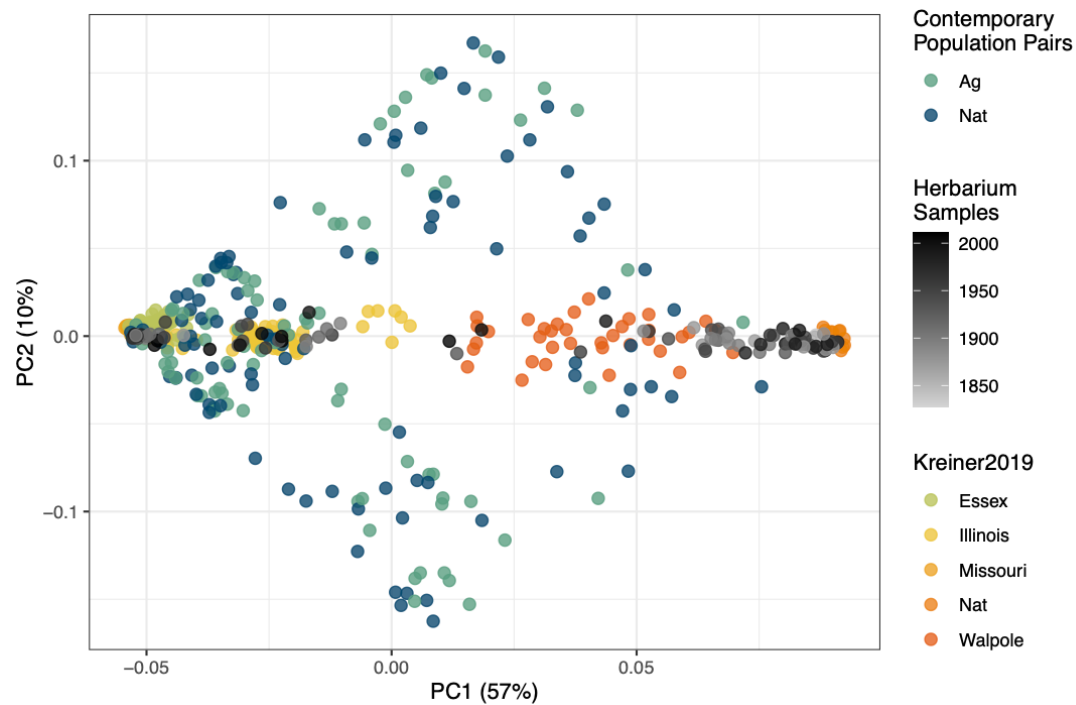

**Fig S13.** PCA of 457 *A. tuberculosis* specimens, including 108 herbarium samples along with contemporary paired populations (*II*) (n=187) and 21 populations from 5 geographic regions (*3I*) (n=162).

## Figure Captions

**Fig 1. Sequenced waterhemp collections through space and time.** **A)** Map of 14 contemporary paired natural-agricultural populations ( $n=187$ , collected and sequenced in Kreiner et al., 2021), along with 108 novel sequenced herbarium specimens dating back to 1828 collected across three environment types (Ag=Agricultural, Nat=Natural, Dist=Disturbed). **B)** Distribution of sequenced herbarium samples through time.

**Fig 2. Signals of contemporary agricultural adaptation, gene flow, and antagonistic selection across the genome in *A. tuberculatus*.** **A)** Results from Cochran–Mantel–Haenszel (CMH) tests for SNPs with consistent differentiation among environments across contemporary natural-agricultural population pairs. A 10% FDR threshold is indicated by the lower dashed horizontal black line, while the Bonferroni  $q$ -value  $< 0.1$  cutoff is shown by the upper dashed horizontal gray line. Red points indicate focal adaptive SNPs after aggregating linked variation ( $r^2 > 0.25$  within 1 Mb). Candidate agriculturally adaptive genes for peaks that are significant at a 10% FDR threshold shown. **B)** CHM results from the scaffold containing the most significant CMH  $p$ -value, corresponding to variants linked to the PPO210 deletion conferring herbicide resistance and to the nearby herbicide-targeted gene *ALS*. **C)** Distribution of  $F_{ST}$  values between all agricultural and natural samples for  $\sim 3$  million genome-wide SNPs (minor allele frequency  $> 0.05$ ). Vertical lines indicate  $F_{ST}$  values for the 10 candidate genes named in A. **D)** Pairwise frequency of six common herbicide resistance alleles across agricultural and natural habitats sampled in 2018; the first four are nonsynonymous variants in *ALS* and *EPSPS*, the *EPSPS*amp is a 10 Mb-scale amplification that includes *EPSPS*, and the last one is an in-frame single-codon deletion in *PPO* (each dot represents on average  $\sim 5$  individuals). Per migrant natural cost: agricultural benefit ratio relative to migration (C:B) is shown in the top right corner of each locus-specific comparison of frequencies across population pairs.

**Fig 3. Genomic signatures of agricultural adaptation through time.** **A)** Agricultural allele frequency trajectories for each locus, in agricultural and disturbed habitats (left), and natural habitats (right). Trajectories coloured by the quantile of frequency change in agricultural and disturbed habitats. Transparent lines indicate those with non-significant evidence of selection at  $\alpha=0.05$  after FDR=10% correction. **B)** The strength of selection on agricultural alleles for each locus in natural (dark gray) and agricultural and disturbed (light gray) habitats between 1870 and 2018. **C)** Agricultural allele frequency trajectories in each environment type, before and after the start of agricultural intensification in 1960. Vertical dashed line represents an inferred breakpoint in the data in a segmented regression. Environmental regression lines represent logistic fits to data that either predate or are subsequent to 1960. Large circles represent moving averages (over both loci and individuals) of allele frequencies, whereas dots represent raw genotype data for each locus and sample from which the allele frequency trajectory is estimated. Cropland use per capita in North America data from (1), rescaled by use in 1600. **D)** The trajectory of alleles at known herbicide resistance loci through time, fit by logistic regression for each of the seven alleles present in our contemporary data. Dots represent genotypes for each historical and contemporary sample at each herbicide resistance locus. 95% credible interval of the maximum likelihood estimate of selection between 1960-2018 provided in the legend for each resistance allele.

**Fig 4. Temporal shifts in the distribution of var. *rudis* ancestry have facilitated polygenic agricultural adaptation.** **A)** Longitudinal clines in individual-level var. *rudis* ancestry over three timespans, illustrating the expansion of var. *rudis* ancestry eastwards over the last two centuries. **B)** The distribution of individual-level var. *rudis* ancestry by state and through time, illustrating state-specific changes in ancestry. Vertical lines represent first, second, and third quantiles of ancestry within each timespan and state. Timespans indicated in A) **C)** Increasing sorting of individual-level var. *rudis* ancestry into agricultural environments on contemporary timescales. **D)** Environment-specific metrics of selection (CMH p-value and cross-population extended haplotype homozygosity (XPEHH)) across the genome in 100 kb windows positively correlate with var. *rudis* ancestry in agricultural, but not natural habitats.
